# Supplementary material for: Kinematics during turning differs in Parkinson’s disease patients with and those without freezing of gait
Source: Research Square preprint supplement (doi:10.21203/rs.3.rs-6862985/v1), 2025-07-15
Supplement: Supplementary file 3 [file 3c4efad3b9b31bcd64bea365.xlsx]

## Sheet: Sheet1
SD Speed
	Estimate	(-95% CI)	(+95% CI)	p-Value	Bayes Factor	Cohen's d	(-95% CI)	(+95% CI)	HDI ROPE 95%	H0 Hypothesis
Group
90° PD vs Elderly	0.01	0	0.02	0.185	0.0193354	0.898298	-0.0544023	1.86832	0.0592	Undecided
90° FOG vs Elderly	0	-0.01	0.02	0.71	0.00501892	0.391892	-0.555346	1.34621	0.293	Undecided
90° FOG vs PD	-0.01	-0.02	0.01	0.578	0.00585937	-0.50895	-1.46951	0.446914	0.2389	Undecided
180° PD vs Elderly	0	-0.01	0.01	0.913	0.00380769	0.22974	-0.709925	1.17532	0.3659	Undecided
180° FOG vs Elderly	0.01	0	0.02	0.558	0.00626878	0.529247	-0.399866	1.46063	0.2296	Undecided
180° FOG vs PD	0	-0.01	0.01	0.816	0.00432937	0.298348	-0.657968	1.24452	0.3288	Undecided
360° PD vs Elderly	0	-0.01	0.01	0.931	0.00364161	-0.203806	-1.14292	0.725436	0.3726	Undecided
360° FOG vs Elderly	0	-0.01	0.01	0.914	0.00369005	-0.183383	-1.13547	0.775633	0.376	Undecided
360° FOG vs PD	0	-0.01	0.01	0.986	0.00350378	0.0169713	-0.938548	0.950744	0.4046	Undecided
Turning Amplitude
Elderly 180° vs 90°	-0.01	-0.02	0	0.318	0.010116	-0.659162	-1.54717	0.224167	0.1535	Undecided
Elderly 360° vs 90°	-0.01	-0.02	0	0.144	0.0233153	-0.901777	-1.78816	-0.00537713	0.0468	Undecided
Elderly 360° vs 180°	0	-0.01	0.01	0.87	0.00365703	-0.236789	-1.11186	0.63123	0.3835	Undecided
PD 180° vs 90°	-0.02	-0.03	-0.01	0.019	0.164976	-1.33936	-2.23703	-0.432667	0	Rejected
PD 360° vs 90°	-0.02	-0.03	-0.01	< .001	473.167	-2.01369	-2.95253	-1.05774	0	Rejected
PD 360° vs 180°	-0.01	-0.02	0	0.333	0.00432937	-0.674973	-1.57071	0.208163	0.1533	Undecided
FOG 180° vs 90°	-0.01	-0.02	0	0.494	0.00643802	-0.520945	-1.38872	0.345743	0.2291	Undecided
FOG 360° vs 90°	-0.02	-0.03	-0.01	0.006	0.508238	-1.48261	-2.39203	-0.55827	0	Rejected
FOG 360° vs 180°	-0.01	-0.02	0	0.102	0.0319698	-0.958839	-1.8363	-0.0809592	0.0295	Undecided
SD Turning Duration
	Estimate	(-95% CI)	(+95% CI)	p-Value	Bayes Factor	Cohen's d	(-95% CI)	(+95% CI)	HDI ROPE 95%	H0 Hypothesis
Group
90° PD vs Elderly	0.02	-0.08	0.13	0.913	0.0345544	0.236738	-0.813829	1.30626	0.3248	Undecided
90° FOG vs Elderly	0.02	-0.09	0.13	0.94	0.0339365	0.225411	-0.869628	1.30461	0.3271	Undecided
90° FOG vs PD	0	-0.1	0.1	> .999	0.0332711	-0.0062659	-1.0672	1.06445	0.3556	Undecided
180° PD vs Elderly	0.02	-0.08	0.13	0.902	0.0368366	0.253508	-0.829403	1.33226	0.3208	Undecided
180° FOG vs Elderly	0	-0.1	0.11	> .999	0.033794	0.042062	-1.04913	1.12687	0.349	Undecided
180° FOG vs PD	-0.02	-0.13	0.09	0.937	0.0364416	-0.209236	-1.3017	0.866686	0.323	Undecided
360° PD vs Elderly	-0.05	-0.16	0.05	0.598	0.0555049	-0.549915	-1.65771	0.522808	0.2168	Undecided
360° FOG vs Elderly	-0.03	-0.14	0.08	0.848	0.0394763	-0.313623	-1.39852	0.784678	0.2988	Undecided
360° FOG vs PD	0.02	-0.08	0.13	0.886	0.0367914	0.232735	-0.84212	1.33146	0.3193	Undecided
Turning Amplitude
Elderly 180° vs 90°	0	-0.09	0.09	> .999	0.0262097	-0.00872036	-0.8793	0.860352	0.4266	Undecided
Elderly 360° vs 90°	0.1	0.01	0.19	0.09	0.296314	1.00503	0.11059	1.89691	0.013	Undecided
Elderly 360° vs 180°	0.1	0.01	0.18	0.085	0.331868	1.0097	0.122716	1.91179	0.0167	Undecided
PD 180° vs 90°	0	-0.08	0.09	0.997	0.0271316	0.0196837	-0.849278	0.89584	0.4242	Undecided
PD 360° vs 90°	0.02	-0.07	0.11	0.896	0.0308995	0.206842	-0.660973	1.08105	0.3854	Undecided
PD 360° vs 180°	0.02	-0.07	0.11	0.937	0.0293869	0.185693	-0.67853	1.08658	0.393	Undecided
FOG 180° vs 90°	-0.02	-0.1	0.07	0.884	0.0303163	-0.179282	-1.0657	0.708	0.3843	Undecided
FOG 360° vs 90°	0.04	-0.04	0.13	0.585	0.0461133	0.458664	-0.426707	1.33855	0.2597	Undecided
FOG 360° vs 180°	0.06	-0.03	0.15	0.377	0.0746672	0.635886	-0.251433	1.53477	0.1708	Undecided
SD Number of Steps
	Estimate	(-95% CI)	(+95% CI)	p-Value	Bayes Factor	Cohen's d	(-95% CI)	(+95% CI)	HDI ROPE 95%	H0 Hypothesis
Group
90° PD vs Elderly	0.03	-0.15	0.2	0.966	0.0573846	0.13652	-0.823579	1.08036	0.3338	Undecided
90° FOG vs Elderly	0.05	-0.13	0.22	0.846	0.0645128	0.260837	-0.678464	1.21558	0.2999	Undecided
90° FOG vs PD	0.02	-0.15	0.2	0.955	0.0559877	0.130378	-0.818439	1.07129	0.3452	Undecided
180° PD vs Elderly	0.06	-0.12	0.23	0.819	0.0675022	0.300637	-0.642721	1.26552	0.2875	Undecided
180° FOG vs Elderly	0.03	-0.14	0.2	0.977	0.0561923	0.155016	-0.765851	1.11342	0.3376	Undecided
180° FOG vs PD	-0.02	-0.2	0.15	0.949	0.0584758	-0.133945	-1.0667	0.801023	0.3361	Undecided
360° PD vs Elderly	-0.06	-0.24	0.11	0.782	0.0698723	-0.334048	-1.29912	0.611413	0.2736	Undecided
360° FOG vs Elderly	0.02	-0.16	0.2	0.955	0.0567807	0.111118	-0.845687	1.06804	0.341	Undecided
360° FOG vs PD	0.08	-0.09	0.26	0.655	0.084992	0.445432	-0.50207	1.40682	0.2312	Undecided
Turning Amplitude
Elderly 180° vs 90°	-0.02	-0.18	0.14	0.965	0.0536873	-0.119156	-0.988518	0.759672	0.3607	Undecided
Elderly 360° vs 90°	0.09	-0.08	0.25	0.568	0.0918325	0.47146	-0.42714	1.34987	0.2168	Undecided
Elderly 360° vs 180°	0.11	-0.05	0.27	0.398	0.131177	0.601174	-0.284815	1.47944	0.1575	Undecided
PD 180° vs 90°	0.01	-0.16	0.17	0.973	0.0520901	0.0470848	-0.827856	0.912743	0.3746	Undecided
PD 360° vs 90°	0	-0.16	0.16	0.999	0.0512739	-0.00171087	-0.869528	0.867831	0.3749	Undecided
PD 360° vs 180°	-0.01	-0.17	0.15	0.994	0.0505591	-0.0394271	-0.889645	0.821892	0.3753	Undecided
FOG 180° vs 90°	-0.04	-0.2	0.12	0.883	0.0591914	-0.219801	-1.08882	0.646334	0.3293	Undecided
FOG 360° vs 90°	0.06	-0.1	0.22	0.726	0.0686363	0.323316	-0.560467	1.21162	0.2879	Undecided
FOG 360° vs 180°	0.1	-0.06	0.26	0.465	0.110083	0.548532	-0.337601	1.40424	0.1808	Undecided
SD Cadence
	Estimate	(-95% CI)	(+95% CI)	p-Value	Bayes Factor	Cohen's d	(-95% CI)	(+95% CI)	HDI ROPE 95%	H0 Hypothesis
Group
90° PD vs Elderly	0.34	-0.87	1.56	0.879	0.435602	0.270634	-0.683164	1.23792	0.3871	Undecided
90° FOG vs Elderly	0.08	-1.11	1.3	0.998	0.387267	0.0648084	-0.884728	1.03905	0.4403	Undecided
90° FOG vs PD	0.19	-1.01	1.4	0.968	0.392742	0.146034	-0.79791	1.10913	0.4288	Undecided
180° PD vs Elderly	-0.29	-1.52	0.95	0.893	0.427709	-0.228178	-1.21974	0.746555	0.4016	Undecided
180° FOG vs Elderly	-0.42	-1.6	0.82	0.773	0.483125	-0.332197	-1.28937	0.644423	0.3535	Undecided
180° FOG vs PD	0.03	-1.16	1.22	> .999	0.38062	0.0225243	-0.926674	0.972582	0.4469	Undecided
360° PD vs Elderly	-0.81	-2.05	0.45	0.428	0.950001	-0.639528	-1.66237	0.349937	0.1998	Undecided
360° FOG vs Elderly	-0.48	-1.7	0.76	0.723	0.530291	-0.381723	-1.35693	0.58959	0.3278	Undecided
360° FOG vs PD	0.18	-1.07	1.4	0.966	0.404012	0.144006	-0.828307	1.10774	0.4216	Undecided
Turning Amplitude
Elderly 180° vs 90°	-0.15	-1.09	0.77	0.943	0.300629	-0.118299	-0.847777	0.602428	0.5388	Undecided
Elderly 360° vs 90°	-0.5	-1.42	0.44	0.568	0.507246	-0.391236	-1.12081	0.339081	0.3474	Undecided
Elderly 360° vs 180°	-0.16	-1.09	0.79	0.952	0.308455	-0.128465	-0.854325	0.604137	0.5329	Undecided
PD 180° vs 90°	-0.66	-1.59	0.3	0.371	0.780501	-0.519686	-1.27215	0.219279	0.2284	Undecided
PD 360° vs 90°	-1.65	-2.59	-0.68	0.005	57.9639	-1.29633	-2.14221	-0.491961	0	Rejected
PD 360° vs 180°	-0.89	-1.82	0.05	0.175	1.73459	-0.707503	-1.46695	0.0338694	0.1	Undecided
FOG 180° vs 90°	-0.65	-1.57	0.28	0.407	0.735319	-0.514774	-1.25954	0.213391	0.2419	Undecided
FOG 360° vs 90°	-1.18	-2.11	-0.25	0.046	6.4705	-0.928247	-1.70758	-0.188602	0	Rejected
FOG 360° vs 180°	-0.49	-1.4	0.44	0.594	0.48485	-0.391159	-1.11999	0.336783	0.3525	Undecided
SD Stride Length Internal Leg
	Estimate	(-95% CI)	(+95% CI)	p-Value	Bayes Factor	Cohen's d	(-95% CI)	(+95% CI)	HDI ROPE 95%	H0 Hypothesis
Group
90° PD vs Elderly	0.01	-0.02	0.04	0.731	0.0110363	0.40842	-0.651294	1.45389	0.2747	Undecided
90° FOG vs Elderly	0.01	-0.01	0.04	0.646	0.0119839	0.465853	-0.574304	1.5029	0.2519	Undecided
90° FOG vs PD	0	-0.03	0.03	> .999	0.00811456	0.0553582	-0.992751	1.10811	0.3693	Undecided
180° PD vs Elderly	-0.02	-0.05	0	0.204	0.0408443	-0.948932	-2.00759	0.0885469	0.0708	Undecided
180° FOG vs Elderly	-0.02	-0.05	0	0.227	0.0364971	-0.915404	-1.95154	0.117066	0.0782	Undecided
180° FOG vs PD	0	-0.03	0.03	0.996	0.00836435	0.0186894	-1.02272	1.06104	0.3664	Undecided
360° PD vs Elderly	-0.02	-0.04	0.01	0.441	0.0186609	-0.676499	-1.74226	0.358305	0.1693	Undecided
360° FOG vs Elderly	-0.02	-0.05	0	0.222	0.0381942	-0.92546	-2.01314	0.115576	0.0779	Undecided
360° FOG vs PD	-0.01	-0.03	0.02	0.893	0.00915322	-0.252332	-1.2906	0.79083	0.3315	Undecided
Turning Amplitude
Elderly 180° vs 90°	0.04	0.01	0.06	0.008	0.888602	1.4314	0.522213	2.34087	0	Rejected
Elderly 360° vs 90°	0.04	0.02	0.06	0.004	1.73219	1.55455	0.635471	2.46598	0	Rejected
Elderly 360° vs 180°	0	-0.02	0.03	0.966	0.00724326	0.122164	-0.751197	0.985217	0.4154	Undecided
PD 180° vs 90°	0	-0.02	0.02	0.985	0.00729123	0.0770232	-0.793144	0.961949	0.4161	Undecided
PD 360° vs 90°	0.01	-0.01	0.03	0.586	0.0122641	0.475308	-0.394072	1.37053	0.2604	Undecided
PD 360° vs 180°	0.01	-0.01	0.03	0.68	0.0107625	0.388415	-0.504575	1.25974	0.296	Undecided
FOG 180° vs 90°	0	-0.02	0.02	0.993	0.00725751	0.0519415	-0.825304	0.929078	0.4152	Undecided
FOG 360° vs 90°	0	-0.02	0.03	0.92	0.0076648	0.16751	-0.699027	1.03922	0.4005	Undecided
FOG 360° vs 180°	0	-0.02	0.03	0.932	0.00772349	0.118092	-0.75502	0.997745	0.4104	Undecided
SD Stride Length External Leg
	Estimate	(-95% CI)	(+95% CI)	p-Value	Bayes Factor	Cohen's d	(-95% CI)	(+95% CI)	HDI ROPE 95%	H0 Hypothesis
Group
90° PD vs Elderly	0.01	-0.02	0.04	0.692	0.0122264	0.455303	-0.607986	1.51923	0.2516	Undecided
90° FOG vs Elderly	0	-0.03	0.03	0.999	0.00809962	0.00389279	-1.04805	1.06109	0.3571	Undecided
90° FOG vs PD	-0.01	-0.04	0.01	0.651	0.012856	-0.462868	-1.52928	0.571313	0.243	Undecided
180° PD vs Elderly	0.01	-0.02	0.04	0.72	0.0117809	0.415594	-0.61058	1.47392	0.2644	Undecided
180° FOG vs Elderly	-0.01	-0.04	0.01	0.546	0.015389	-0.592005	-1.66616	0.45376	0.198	Undecided
180° FOG vs PD	-0.03	-0.05	0	0.157	0.0524582	-1.01148	-2.07844	0.024271	0.0473	Undecided
360° PD vs Elderly	0.01	-0.02	0.04	0.685	0.0122238	0.446172	-0.59104	1.49772	0.251	Undecided
360° FOG vs Elderly	0	-0.02	0.03	0.983	0.00845772	0.117217	-0.956241	1.17986	0.3508	Undecided
360° FOG vs PD	-0.01	-0.03	0.02	0.847	0.0101934	-0.324881	-1.37494	0.712826	0.299	Undecided
Turning Amplitude
Elderly 180° vs 90°	0.02	-0.01	0.04	0.392	0.0179284	0.630834	-0.247349	1.51408	0.168	Undecided
Elderly 360° vs 90°	0	-0.02	0.02	0.994	0.00696013	-0.0537898	-0.934995	0.833696	0.4148	Undecided
Elderly 360° vs 180°	-0.02	-0.04	0.01	0.312	0.0222573	-0.680466	-1.5646	0.206964	0.1426	Undecided
PD 180° vs 90°	0.01	-0.01	0.04	0.447	0.0161665	0.584281	-0.30604	1.46683	0.1861	Undecided
PD 360° vs 90°	0	-0.02	0.02	0.996	0.00726037	-0.0646702	-0.94353	0.811903	0.4087	Undecided
PD 360° vs 180°	-0.02	-0.04	0.01	0.355	0.0204728	-0.655724	-1.53999	0.230558	0.1547	Undecided
FOG 180° vs 90°	0	-0.02	0.02	0.996	0.00692154	0.0327184	-0.846608	0.902632	0.4221	Undecided
FOG 360° vs 90°	0	-0.02	0.02	0.982	0.00714679	0.0655849	-0.812924	0.953565	0.4152	Undecided
FOG 360° vs 180°	0	-0.02	0.02	0.991	0.00692222	0.0268012	-0.847818	0.89432	0.4123	Undecided
SD Step Length Internal Leg
	Estimate	(-95% CI)	(+95% CI)	p-Value	Bayes Factor	Cohen's d	(-95% CI)	(+95% CI)	HDI ROPE 95%	H0 Hypothesis
Group
90° PD vs Elderly	0	-0.02	0.02	0.989	0.00709727	-0.0571198	-1.02667	0.899726	0.3778	Undecided
90° FOG vs Elderly	0	-0.03	0.02	0.946	0.00728074	-0.170541	-1.12348	0.790041	0.3635	Undecided
90° FOG vs PD	0	-0.02	0.02	0.968	0.00730255	-0.118541	-1.05866	0.825924	0.3749	Undecided
180° PD vs Elderly	-0.02	-0.05	0	0.109	0.0621509	-1.01715	-2.01775	-0.0696087	0.0276	Undecided
180° FOG vs Elderly	-0.02	-0.05	0	0.095	0.0702717	-1.06189	-2.0406	-0.106474	0.0224	Undecided
180° FOG vs PD	0	-0.02	0.02	0.991	0.00713464	-0.0493003	-1.00525	0.906926	0.3875	Undecided
360° PD vs Elderly	-0.02	-0.04	0	0.202	0.0338674	-0.862168	-1.83093	0.0768007	0.0731	Undecided
360° FOG vs Elderly	-0.02	-0.04	0	0.243	0.0278532	-0.827841	-1.79186	0.113507	0.0866	Undecided
360° FOG vs PD	0	-0.02	0.02	0.992	0.00714149	0.0226307	-0.933535	0.986872	0.3808	Undecided
Turning Amplitude
Elderly 180° vs 90°	0.04	0.02	0.06	0.004	1.50954	1.60154	0.672239	2.53183	0	Rejected
Elderly 360° vs 90°	0.02	0	0.04	0.137	0.0480456	0.898389	0.00237771	1.79074	0.0405	Undecided
Elderly 360° vs 180°	-0.02	-0.04	0	0.289	0.0214494	-0.692001	-1.57122	0.188208	0.1263	Undecided
PD 180° vs 90°	0.01	-0.01	0.04	0.36	0.0175847	0.634097	-0.248964	1.51704	0.1606	Undecided
PD 360° vs 90°	0	0.02	0.02	0.994	0.00651742	0.101406	-0.773356	0.966431	0.4077	Undecided
PD 360° vs 180°	-0.01	-0.03	0.01	0.5	0.013621	-0.533367	-1.42353	0.358198	0.2153	Undecided
FOG 180° vs 90°	0.02	0	0.04	0.283	0.0235405	0.695905	-0.198208	1.58909	0.1288	Undecided
FOG 360° vs 90°	0.01	-0.02	0.03	0.862	0.00755664	0.242985	-0.639787	1.10992	0.3539	Undecided
FOG 360° vs 180°	-0.01	-0.03	0.01	0.58	0.0113832	-0.452512	-1.33216	0.430315	0.2537	Undecided
SD Step Length External Leg
	Estimate	(-95% CI)	(+95% CI)	p-Value	Bayes Factor	Cohen's d	(-95% CI)	(+95% CI)	HDI ROPE 95%	H0 Hypothesis
Group
90° PD vs Elderly	0	-0.01	0.02	0.86	0.00645588	0.306063	-0.791926	1.41692	0.3236	Undecided
90° FOG vs Elderly	-0.01	-0.02	0.01	0.729	0.0077195	-0.438881	-1.56262	0.681397	0.2797	Undecided
90° FOG vs PD	-0.01	-0.03	0.01	0.418	0.0130588	-0.728911	-1.84079	0.369627	0.1665	Undecided
180° PD vs Elderly	0.02	0	0.03	0.212	0.0269391	0.992188	-0.0977292	2.1207	0.0744	Undecided
180° FOG vs Elderly	-0.01	-0.03	0	0.36	0.0152138	-0.816869	-1.94425	0.277174	0.138	Undecided
180° FOG vs PD	-0.03	-0.05	-0.01	0.005	1.08491	-1.81134	-3.01146	-0.680639	0	Rejected
360° PD vs Elderly	0.02	0	0.03	0.221	0.0258389	0.980915	-0.122977	2.11748	0.0778	Undecided
360° FOG vs Elderly	0	-0.02	0.01	0.932	0.00597884	-0.18543	-1.29963	0.92982	0.356	Undecided
360° FOG vs PD	-0.02	-0.04	0	0.125	0.042784	-1.16249	-2.29166	-0.0511988	0.0329	Undecided
Turning Amplitude
Elderly 180° vs 90°	0	-0.01	0.02	0.768	0.00576072	0.315564	-0.55853	1.18332	0.3646	Undecided
Elderly 360° vs 90°	-0.01	-0.02	0.01	0.718	0.00624186	-0.345474	-1.22665	0.540151	0.3484	Undecided
Elderly 360° vs 180°	-0.01	-0.02	0	0.345	0.0131238	-0.65878	-1.54433	0.250375	0.1679	Undecided
PD 180° vs 90°	0.02	0	0.03	0.087	0.0527911	1.01501	0.108755	1.90962	0.0252	Undecided
PD 360° vs 90°	0.01	-0.01	0.02	0.704	0.00613705	0.355561	-0.527083	1.21986	0.3406	Undecided
PD 360° vs 180°	-0.01	-0.02	0	0.334	0.0135148	-0.670021	-1.5504	0.197974	0.1587	Undecided
FOG 180° vs 90°	0	-0.02	0.01	0.993	0.00432018	-0.0568497	-0.941768	0.818007	0.4576	Undecided
FOG 360° vs 90°	0	-0.02	0.01	0.981	0.0042918	-0.0845052	-0.965098	0.791179	0.4547	Undecided
FOG 360° vs 180°	0	-0.01	0.01	0.995	0.00440027	-0.0231007	-0.899481	0.84751	0.4631	Undecided
SD Stride Width Internal Leg
	Estimate	(-95% CI)	(+95% CI)	p-Value	Bayes Factor	Cohen's d	(-95% CI)	(+95% CI)	HDI ROPE 95%	H0 Hypothesis
Group
90° PD vs Elderly	-0.01	-0.02	0.01	0.729	0.00606548	-0.609446	-2.19668	0.984512	0.2765	Undecided
90° FOG vs Elderly	-0.02	-0.03	0	0.103	0.0436122	-1.729	-3.37915	-0.136022	0.02	Undecided
90° FOG vs PD	-0.01	-0.02	0	0.369	0.0124146	-1.12445	-2.76898	0.461549	0.1395	Undecided
180° PD vs Elderly	0	-0.01	0.01	0.994	0.004602	-0.0210148	-1.61918	1.56538	0.3632	Undecided
180° FOG vs Elderly	-0.01	-0.03	0	0.228	0.0201052	-1.40333	-3.04445	0.190097	0.0747	Undecided
180° FOG vs PD	-0.01	-0.03	0	0.234	0.020323	-1.36905	-3.06043	0.239209	0.0872	Undecided
360° PD vs Elderly	0	-0.02	0.01	0.895	0.00516402	-0.367501	-1.9774	1.22718	0.33	Undecided
360° FOG vs Elderly	-0.01	-0.03	0	0.269	0.0170764	-1.27815	-2.90984	0.292149	0.1031	Undecided
360° FOG vs PD	-0.01	-0.02	0.01	0.513	0.00867398	-0.910071	-2.50724	0.638097	0.2003	Undecided
Turning Amplitude
Elderly 180° vs 90°	-0.01	-0.01	0	0.276	0.00884516	-0.708649	-1.59488	0.186615	0.2019	Undecided
Elderly 360° vs 90°	-0.01	-0.02	0	0.213	0.0118971	-0.787626	-1.66592	0.0924839	0.1485	Undecided
Elderly 360° vs 180°	0	-0.01	0.01	0.996	0.00252654	-0.0822091	-0.966413	0.805766	0.5905	Undecided
PD 180° vs 90°	0	-0.01	0.01	0.93	0.00267656	-0.117517	-0.990015	0.750685	0.5933	Undecided
PD 360° vs 90°	-0.01	-0.01	0	0.457	0.00555273	-0.546224	-1.43252	0.343976	0.3212	Undecided
PD 360° vs 180°	0	-0.01	0	0.624	0.00412487	-0.432805	-1.31132	0.448973	0.4095	Undecided
FOG 180° vs 90°	0	-0.01	0	0.711	0.00376997	-0.376105	-1.2666	0.51825	0.4436	Undecided
FOG 360° vs 90°	0	-0.01	0.01	0.732	0.00350639	-0.338197	-1.22459	0.549986	0.4724	Undecided
FOG 360° vs 180°	0	-0.01	0.01	> .999	0.00265606	0.0360797	-0.859973	0.915523	0.5893	Undecided
SD Stride Width External Leg
	Estimate	(-95% CI)	(+95% CI)	p-Value	Bayes Factor	Cohen's d	(-95% CI)	(+95% CI)	HDI ROPE 95%	H0 Hypothesis
Group
90° PD vs Elderly	0.01	-0.01	0.02	0.59	0.00753245	0.668753	-0.614754	1.99337	0.2197	Undecided
90° FOG vs Elderly	0	-0.02	0.01	0.915	0.00484048	-0.285399	-1.56967	0.998994	0.3284	Undecided
90° FOG vs PD	-0.01	-0.02	0	0.364	0.0127511	-0.936448	-2.24941	0.363169	0.1389	Undecided
180° PD vs Elderly	-0.01	-0.03	0	0.147	0.029721	-1.2523	-2.57616	0.0394789	0.0463	Undecided
180° FOG vs Elderly	-0.02	-0.03	0	0.109	0.0421971	-1.40359	-2.74778	-0.0969176	0.0215	Undecided
180° FOG vs PD	0	-0.02	0.01	0.962	0.00473594	-0.157467	-1.48936	1.14054	0.35	Undecided
360° PD vs Elderly	-0.01	-0.02	0.01	0.525	0.0087074	-0.723738	-2.03338	0.555739	0.1977	Undecided
360° FOG vs Elderly	0	-0.02	0.01	0.813	0.00570666	-0.430615	-1.74056	0.854675	0.294	Undecided
360° FOG vs PD	0	-0.01	0.02	0.896	0.00524988	0.285862	-1.03526	1.60526	0.3275	Undecided
Turning Amplitude
Elderly 180° vs 90°	0.02	0.01	0.03	0.019	0.157219	1.34605	0.422722	2.25741	0	Rejected
Elderly 360° vs 90°	0.01	0	0.02	0.167	0.018832	0.864559	-0.0389939	1.758	0.0826	Undecided
Elderly 360° vs 180°	-0.01	-0.02	0	0.556	0.00554972	-0.482145	-1.36512	0.395614	0.3015	Undecided
PD 180° vs 90°	-0.01	-0.02	0	0.407	0.0075978	-0.58767	-1.47243	0.299481	0.2388	Undecided
PD 360° vs 90°	-0.01	-0.02	0	0.533	0.00597531	-0.533009	-1.41855	0.350033	0.2731	Undecided
PD 360° vs 180°	0	-0.01	0.01	0.994	0.0031919	0.0479723	-0.813614	0.919687	0.5055	Undecided
FOG 180° vs 90°	0	-0.01	0.01	0.895	0.00340013	0.216343	-0.65741	1.08984	0.4549	Undecided
FOG 360° vs 90°	0.01	0	0.02	0.275	0.0109297	0.701766	-0.183138	1.57874	0.1607	Undecided
FOG 360° vs 180°	0.01	0	0.02	0.563	0.00547356	0.487885	-0.398199	1.37852	0.2976	Undecided
SD Gait Cycle Duration Internal Leg
	Estimate	(-95% CI)	(+95% CI)	p-Value	Bayes Factor	Cohen's d	(-95% CI)	(+95% CI)	HDI ROPE 95%	H0 Hypothesis
Group
90° PD vs Elderly	0.01	-0.01	0.03	0.427	0.0152766	0.847452	-0.390427	2.11339	0.153	Undecided
90° FOG vs Elderly	0	-0.02	0.02	0.998	0.00637964	-0.0275363	-1.29261	1.20003	0.3619	Undecided
90° FOG vs PD	-0.01	-0.03	0.01	0.362	0.0169294	-0.879644	-2.13956	0.337743	0.137	Undecided
180° PD vs Elderly	0	-0.03	0.02	0.898	0.00696422	-0.293624	-1.54747	0.94889	0.3269	Undecided
180° FOG vs Elderly	-0.02	-0.04	0	0.146	0.0437487	-1.23125	-2.50963	0.00296362	0.041	Undecided
180° FOG vs PD	-0.02	-0.04	0	0.319	0.0198255	-0.936837	-2.20028	0.284581	0.122	Undecided
360° PD vs Elderly	-0.01	-0.03	0.01	0.719	0.00921648	-0.534873	-1.81262	0.691827	0.2594	Undecided
360° FOG vs Elderly	-0.01	-0.03	0.01	0.747	0.00879528	-0.483988	-1.74979	0.749463	0.2732	Undecided
360° FOG vs PD	0	-0.02	0.02	> .999	0.00634418	0.054752	-1.1798	1.2882	0.3645	Undecided
Turning Amplitude
Elderly 180° vs 90°	0.02	0.01	0.04	0.005	0.976792	1.50983	0.59744	2.4275	0	Rejected
Elderly 360° vs 90°	0.02	0	0.03	0.062	0.0768673	1.08585	0.181371	1.99989	0.0147	Undecided
Elderly 360° vs 180°	-0.01	-0.02	0.01	0.637	0.00706139	-0.420763	-1.30832	0.454437	0.3278	Undecided
PD 180° vs 90°	0.01	-0.01	0.02	0.697	0.0064974	0.370241	-0.496185	1.26606	0.3568	Undecided
PD 360° vs 90°	0	-0.02	0.01	0.832	0.00539828	-0.285595	-1.16033	0.586764	0.4057	Undecided
PD 360° vs 180°	-0.01	-0.03	0	0.363	0.0128362	-0.651608	-1.52605	0.238919	0.1854	Undecided
FOG 180° vs 90°	0	-0.01	0.02	0.803	0.00578675	0.3008	-0.58098	1.18516	0.3917	Undecided
FOG 360° vs 90°	0.01	0	0.03	0.346	0.013564	0.645818	-0.261569	1.53862	0.1895	Undecided
FOG 360° vs 180°	0.01	-0.01	0.02	0.775	0.00632456	0.338428	-0.550597	1.21965	0.3761	Undecided
SD Gait Cycle Duration External Leg
	Estimate	(-95% CI)	(+95% CI)	p-Value	Bayes Factor	Cohen's d	(-95% CI)	(+95% CI)	HDI ROPE 95%	H0 Hypothesis
Group
90° PD vs Elderly	0.01	-0.01	0.03	0.878	0.0074075	0.35886	-0.908404	1.61444	0.3015	Undecided
90° FOG vs Elderly	0.01	-0.02	0.03	0.835	0.0075645	0.342542	-0.92632	1.62401	0.299	Undecided
90° FOG vs PD	0	-0.02	0.02	> .999	0.00632663	-0.0138402	-1.30821	1.27401	0.3539	Undecided
180° PD vs Elderly	0.01	-0.02	0.03	0.814	0.0079851	0.396815	-0.928158	1.71465	0.2908	Undecided
180° FOG vs Elderly	-0.01	-0.03	0.01	0.816	0.00815638	-0.438844	-1.73425	0.85314	0.2812	Undecided
180° FOG vs PD	-0.01	-0.03	0.01	0.434	0.0148811	-0.834041	-2.12968	0.441845	0.1578	Undecided
360° PD vs Elderly	0	-0.02	0.02	0.92	0.0073247	-0.204079	-1.51779	1.06355	0.3266	Undecided
360° FOG vs Elderly	-0.01	-0.03	0.01	0.734	0.00919678	-0.491634	-1.78489	0.825312	0.2621	Undecided
360° FOG vs PD	0	-0.03	0.02	0.917	0.00725469	-0.288364	-1.57385	0.960582	0.3174	Undecided
Turning Amplitude
Elderly 180° vs 90°	0.01	0	0.03	0.171	0.0263166	0.854714	-0.0244247	1.73762	0.0786	Undecided
Elderly 360° vs 90°	0.01	0	0.03	0.308	0.0143086	0.689441	-0.193214	1.5714	0.155	Undecided
Elderly 360° vs 180°	0	-0.02	0.01	0.935	0.00492108	-0.169833	-1.05786	0.725851	0.4494	Undecided
PD 180° vs 90°	0.01	0	0.03	0.139	0.0330404	0.906816	0.00685996	1.79322	0.0574	Undecided
PD 360° vs 90°	0	-0.01	0.02	0.974	0.00467201	0.133146	-0.744785	1.00435	0.4607	Undecided
PD 360° vs 180°	-0.01	-0.03	0	0.226	0.0196722	-0.771981	-1.65258	0.11465	0.1175	Undecided
FOG 180° vs 90°	0	-0.01	0.02	0.987	0.00459212	0.0803369	-0.800085	0.955262	0.4837	Undecided
FOG 360° vs 90°	0	-0.02	0.01	0.942	0.00491098	-0.143336	-1.01587	0.731657	0.4652	Undecided
FOG 360° vs 180°	0	-0.02	0.01	0.885	0.00521556	-0.22813	-1.11028	0.652335	0.4289	Undecided
SD Stance Duration Internal Leg
	Estimate	(-95% CI)	(+95% CI)	p-Value	Bayes Factor	Cohen's d	(-95% CI)	(+95% CI)	HDI ROPE 95%	H0 Hypothesis
Group
90° PD vs Elderly	0.01	0	0.03	0.11	0.0381761	1.4444	0.0831633	2.87704	0.0236	Undecided
90° FOG vs Elderly	0.01	-0.01	0.02	0.664	0.00630687	0.612745	-0.750189	2.00048	0.2429	Undecided
90° FOG vs PD	-0.01	-0.02	0.01	0.471	0.00891801	-0.827611	-2.2216	0.566472	0.1794	Undecided
180° PD vs Elderly	0	-0.01	0.01	0.992	0.00416922	0.0902682	-1.25303	1.45515	0.3602	Undecided
180° FOG vs Elderly	-0.01	-0.02	0	0.372	0.0115476	-0.992213	-2.37941	0.355709	0.1362	Undecided
180° FOG vs PD	-0.01	-0.02	0	0.318	0.0132281	-1.052	-2.44955	0.307425	0.1192	Undecided
360° PD vs Elderly	0	-0.02	0.01	0.968	0.00434652	-0.180627	-1.55322	1.17622	0.3491	Undecided
360° FOG vs Elderly	0	-0.02	0.01	0.946	0.00446151	-0.245639	-1.5898	1.10907	0.3419	Undecided
360° FOG vs PD	0	-0.01	0.01	0.986	0.00421181	-0.0694132	-1.45045	1.31411	0.3512	Undecided
Turning Amplitude
Elderly 180° vs 90°	0.02	0.01	0.02	0.002	1.6441	1.63965	0.713637	2.58107	0	Rejected
Elderly 360° vs 90°	0.01	0.01	0.02	0.009	0.334023	1.40341	0.498772	2.3058	0	Rejected
Elderly 360° vs 180°	0	-0.01	0.01	0.85	0.0031881	-0.2387	-1.09523	0.626375	0.4696	Undecided
PD 180° vs 90°	0	-0.01	0.01	0.819	0.00337655	0.279	-0.607309	1.16958	0.4459	Undecided
PD 360° vs 90°	0	-0.01	0.01	0.874	0.00309932	-0.243433	-1.12388	0.619021	0.4703	Undecided
PD 360° vs 180°	-0.01	-0.01	0	0.497	0.00545203	-0.526253	-1.40092	0.35428	0.2914	Undecided
FOG 180° vs 90°	0	-0.01	0.01	0.988	0.00278392	0.0496649	-0.830021	0.919274	0.5219	Undecided
FOG 360° vs 90°	0.01	0	0.01	0.529	0.00525894	0.516407	-0.367038	1.39548	0.2951	Undecided
FOG 360° vs 180°	0	0	0.01	0.563	0.00482652	0.467335	-0.40867	1.34385	0.3265	Undecided
SD Stance Duration External Leg
	Estimate	(-95% CI)	(+95% CI)	p-Value	Bayes Factor	Cohen's d	(-95% CI)	(+95% CI)	HDI ROPE 95%	H0 Hypothesis
Group
90° PD vs Elderly	0.01	0	0.02	0.324	0.0132969	1.49807	-0.476414	3.52637	0.1171	Undecided
90° FOG vs Elderly	0	-0.01	0.02	0.876	0.0048565	0.495727	-1.46995	2.51628	0.3116	Undecided
90° FOG vs PD	-0.01	-0.02	0.01	0.616	0.006954	-0.996224	-3.03432	1.03319	0.2177	Undecided
180° PD vs Elderly	0.01	-0.01	0.02	0.65	0.00660023	0.897809	-1.0789	2.90586	0.235	Undecided
180° FOG vs Elderly	0	-0.02	0.01	0.934	0.00449316	-0.269236	-2.24172	1.74655	0.3364	Undecided
180° FOG vs PD	-0.01	-0.02	0.01	0.462	0.00916656	-1.16556	-3.16607	0.80831	0.1767	Undecided
360° PD vs Elderly	0	-0.01	0.01	> .999	0.00437347	0.0345483	-1.92483	2.0399	0.35	Undecided
360° FOG vs Elderly	0	-0.02	0.01	0.79	0.0055158	-0.710917	-2.73213	1.27834	0.2729	Undecided
360° FOG vs PD	-0.01	-0.02	0.01	0.733	0.00591732	-0.750772	-2.80748	1.26557	0.2594	Undecided
Turning Amplitude
Elderly 180° vs 90°	0.01	0	0.02	0.014	0.133328	1.36649	0.463236	2.27586	0	Rejected
Elderly 360° vs 90°	0.01	0	0.02	0.019	0.0993236	1.32321	0.408212	2.22885	0	Rejected
Elderly 360° vs 180°	0	-0.01	0.01	0.99	0.0018803	-0.0416329	-0.937751	0.827686	0.6969	Undecided
PD 180° vs 90°	0.01	0	0.01	0.246	0.00807765	0.777783	-0.104756	1.66431	0.2048	Undecided
PD 360° vs 90°	0	-0.01	0.01	0.965	0.00199118	-0.131086	-1.02313	0.740716	0.6693	Undecided
PD 360° vs 180°	-0.01	-0.01	0	0.133	0.0146527	-0.903109	-1.7952	-0.0168019	0.1255	Undecided
FOG 180° vs 90°	0	0	0.01	0.362	0.00530341	0.629746	-0.26206	1.52124	0.3189	Undecided
FOG 360° vs 90°	0	-0.01	0.01	0.956	0.00197053	0.13508	-0.744162	1.01499	0.6806	Undecided
FOG 360° vs 180°	0	-0.01	0	0.534	0.00341474	-0.498638	-1.38126	0.382035	0.431	Undecided
SD Initial Double Support Duration Internal Leg
	Estimate	(-95% CI)	(+95% CI)	p-Value	Bayes Factor	Cohen's d	(-95% CI)	(+95% CI)	HDI ROPE 95%	H0 Hypothesis
Group
90° PD vs Elderly	0	0	0.01	0.509	0.00486664	0.768161	-0.549393	2.10719	0.1935	Undecided
90° FOG vs Elderly	0	0	0.01	0.733	0.00338287	0.534963	-0.762012	1.89192	0.2766	Undecided
90° FOG vs PD	0	-0.01	0.01	0.938	0.00259016	-0.224655	-1.54196	1.09012	0.3564	Undecided
180° PD vs Elderly	0	-0.01	0.01	0.987	0.00253769	0.00402117	-1.31904	1.34303	0.3688	Undecided
180° FOG vs Elderly	0	-0.01	0.01	0.961	0.0026026	-0.165645	-1.49431	1.17679	0.361	Undecided
180° FOG vs PD	0	-0.01	0.01		0.00248305	-0.180426	-1.50915	1.15564	0.3567	Undecided
360° PD vs Elderly	0	-0.01	0.01	0.828	0.00309282	0.447894	-0.899309	1.79624	0.2985	Undecided
360° FOG vs Elderly	0	0	0.01	0.46	0.00542043	0.816612	-0.493066	2.15212	0.1799	Undecided
360° FOG vs PD	0	-0.01	0.01	0.846	0.00289199	0.389139	-0.941434	1.71808	0.3164	Undecided
Turning Amplitude
Elderly 180° vs 90°	0.01	0	0.01	0.006	0.318588	1.46589	0.531312	2.38056	0	Rejected
Elderly 360° vs 90°	0.01	0	0.01	0.007	0.242408	1.46386	0.548177	2.38878	0	Rejected
Elderly 360° vs 180°	0	-0.01	0.01	> .999	0.00168154	-0.00271077	-0.867361	0.873353	0.531	Undecided
PD 180° vs 90°	0	0	0.01	0.277	0.00605055	0.712907	-0.163933	1.59092	0.1598	Undecided
PD 360° vs 90°	0.01	0	0.01	0.042	0.0406141	1.13665	0.240813	2.04189	0.0093	Undecided
PD 360° vs 180°	0	0	0.01		0.00260976	0.43214	-0.445772	1.31497	0.357	Undecided
FOG 180° vs 90°	0	0	0.01	0.244	0.0067948	0.765557	-0.1184	1.66482	0.1285	Undecided
FOG 360° vs 90°	0.01	0.01	0.02	0.001	1.64125	1.7521	0.810545	2.6894	0	Rejected
FOG 360° vs 180°	0.01	0	0.01	0.093	0.0182534	0.985883	0.0952357	1.87994	0.0436	Undecided
SD Initial Double Support Duration External Leg
	Estimate	(-95% CI)	(+95% CI)	p-Value	Bayes Factor	Cohen's d	(-95% CI)	(+95% CI)	HDI ROPE 95%	H0 Hypothesis
Group
90° PD vs Elderly	0.01	0	0.01	0.172	0.011245	1.46087	-0.0615865	3.02223	0.0524	Undecided
90° FOG vs Elderly	0	0	0.01	0.399	0.00487183	1.0439	-0.470404	2.60281	0.1554	Undecided
90° FOG vs PD	0	-0.01	0	0.875	0.00216576	-0.439492	-1.97829	1.07514	0.3227	Undecided
180° PD vs Elderly	0	0	0.01	0.3	0.00638605	1.18234	-0.37547	2.7681	0.1185	Undecided
180° FOG vs Elderly	0	0	0.01	0.71	0.00271835	0.657552	-0.884012	2.23439	0.2648	Undecided
180° FOG vs PD	0	-0.01	0	0.755	0.00254844	-0.543953	-2.10335	1.00627	0.2918	Undecided
360° PD vs Elderly	0	0	0.01	0.329	0.00583512	1.1537	-0.349588	2.73498	0.1288	Undecided
360° FOG vs Elderly	0	0	0.01	0.742	0.00260929	0.5985	-0.931791	2.14632	0.2799	Undecided
360° FOG vs PD	0	-0.01	0	0.771	0.00245584	-0.523957	-2.10472	1.00971	0.2939	Undecided
Turning Amplitude
Elderly 180° vs 90°	0.01	0	0.01	0.006	0.183546	1.50653	0.581511	2.44338	0	Rejected
Elderly 360° vs 90°	0	0	0.01	0.059	0.0195894	1.08338	0.190387	1.98046	0.0297	Undecided
Elderly 360° vs 180°	0	-0.01	0	0.621	0.00178863	-0.422789	-1.29909	0.454484	0.4111	Undecided
PD 180° vs 90°	0.01	0	0.01	0.026	0.0430719	1.24957	0.350981	2.1431	0.0007	Undecided
PD 360° vs 90°	0	0	0.01	0.233	0.00470612	0.781361	-0.0916015	1.65793	0.1512	Undecided
PD 360° vs 180°	0	-0.01	0	0.562	0.00202111	-0.465576	-1.34492	0.403147	0.3852	Undecided
FOG 180° vs 90°	0	0	0.01	0.048	0.0227346	1.12553	0.234935	2.01658	0.0179	Undecided
FOG 360° vs 90°	0	0	0.01	0.335	0.0033574	0.655486	-0.227609	1.53532	0.2378	Undecided
FOG 360° vs 180°	0	-0.01	0	0.566	0.00199198	-0.464294	-1.34319	0.417535	0.3835	Undecided
SD Stance/Cycle Ratio: Internal Leg
	Estimate	(-95% CI)	(+95% CI)	p-Value	Bayes Factor	Cohen's d	(-95% CI)	(+95% CI)	HDI ROPE 95%	H0 Hypothesis
Group
90° PD vs Elderly	0.37	-0.24	1.01	0.477	0.406959	0.76126	-0.488523	2.07006	0.1935	Undecided
90° FOG vs Elderly	0.2	-0.42	0.83	0.809	0.245106	0.411084	-0.856705	1.70663	0.3065	Undecided
90° FOG vs PD	-0.13	-0.75	0.51	0.933	0.213169	-0.253707	-1.52434	1.01781	0.3444	Undecided
180° PD vs Elderly	0.3	-0.33	0.93	0.65	0.310665	0.601441	-0.666176	1.89798	0.2474	Undecided
180° FOG vs Elderly	0.03	-0.61	0.67	0.997	0.203372	0.0511642	-1.23741	1.34025	0.3677	Undecided
180° FOG vs PD	-0.21	-0.83	0.42	0.821	0.244036	-0.428327	-1.71711	0.84602	0.3018	Undecided
360° PD vs Elderly	0.15	-0.47	0.79	0.897	0.217193	0.310167	-0.953468	1.61306	0.3365	Undecided
360° FOG vs Elderly	0.27	-0.35	0.9	0.68	0.279056	0.543292	-0.717169	1.84019	0.2686	Undecided
360° FOG vs PD	0.15	-0.47	0.78	0.88	0.225437	0.308987	-0.950929	1.60696	0.3331	Undecided
Turning Amplitude
Elderly 180° vs 90°	0.48	0.06	0.91	0.082	1.64829	0.97652	0.112118	1.84743	0.036	Undecided
Elderly 360° vs 90°	0.55	0.13	0.96	0.041	3.26898	1.11268	0.255519	1.97255	0.0088	Undecided
Elderly 360° vs 180°	0.09	-0.33	0.51	0.908	0.147468	0.180495	-0.664409	1.01781	0.4937	Undecided
PD 180° vs 90°	0.39	-0.03	0.82	0.184	0.732394	0.797522	-0.0579972	1.65495	0.1032	Undecided
PD 360° vs 90°	0.32	-0.09	0.74	0.317	0.407912	0.649253	-0.182445	1.49514	0.1878	Undecided
PD 360° vs 180°	-0.04	-0.45	0.38	0.978	0.134441	-0.0826607	-0.903247	0.748319	0.5221	Undecided
FOG 180° vs 90°	0.28	-0.14	0.7	0.427	0.312291	0.570252	-0.278863	1.43056	0.2488	Undecided
FOG 360° vs 90°	0.6	0.18	1.02	0.024	5.70607	1.21599	0.342497	2.10428	0	Rejected
FOG 360° vs 180°	0.32	-0.1	0.74	0.333	0.403075	0.650145	-0.193027	1.49891	0.1881	Undecided
SD Stance/Cycle Ratio: External Leg
	Estimate	(-95% CI)	(+95% CI)	p-Value	Bayes Factor	Cohen's d	(-95% CI)	(+95% CI)	HDI ROPE 95%	H0 Hypothesis
Group
90° PD vs Elderly	0.41	-0.17	0.99	0.367	0.483214	0.860719	-0.367813	2.12703	0.1455	Undecided
90° FOG vs Elderly	0.11	-0.46	0.69	0.927	0.19365	0.240783	-0.965915	1.46573	0.3469	Undecided
90° FOG vs PD	-0.25	-0.82	0.33	0.685	0.273104	-0.52959	-1.75606	0.700126	0.2571	Undecided
180° PD vs Elderly	-0.04	-0.61	0.54	0.996	0.181712	-0.0785516	-1.31219	1.14298	0.369	Undecided
180° FOG vs Elderly	-0.08	-0.65	0.49	0.944	0.18972	-0.169774	-1.38262	1.0274	0.3584	Undecided
180° FOG vs PD	-0.03	-0.61	0.55	0.984	0.182711	-0.0656738	-1.28625	1.17212	0.3687	Undecided
360° PD vs Elderly	0.32	-0.26	0.9	0.553	0.319526	0.668358	-0.536888	1.91638	0.2133	Undecided
360° FOG vs Elderly	0.15	-0.42	0.73	0.875	0.205592	0.325346	-0.895121	1.56001	0.3237	Undecided
360° FOG vs PD	-0.12	-0.7	0.45	0.892	0.198747	-0.263818	-1.49319	0.941735	0.3349	Undecided
Turning Amplitude
Elderly 180° vs 90°	0.67	0.26	1.07	0.009	13.2791	1.41303	0.515521	2.30854	0	Rejected
Elderly 360° vs 90°	0.36	-0.04	0.77	0.192	0.653061	0.770003	-0.0923357	1.63763	0.1067	Undecided
Elderly 360° vs 180°	-0.27	-0.67	0.14	0.43	0.297677	-0.562211	-1.41594	0.291016	0.2404	Undecided
PD 180° vs 90°	0.2	-0.21	0.6	0.622	0.211736	0.414037	-0.430302	1.26118	0.3438	Undecided
PD 360° vs 90°	0.29	-0.11	0.7	0.373	0.350341	0.616468	-0.22878	1.464	0.2061	Undecided
PD 360° vs 180°	0.1	-0.31	0.5	0.89	0.143425	0.208652	-0.629989	1.04717	0.4568	Undecided
FOG 180° vs 90°	0.42	0.02	0.82	0.123	0.983482	0.890622	0.0362127	1.74543	0.0562	Undecided
FOG 360° vs 90°	0.39	-0.01	0.8	0.16	0.782594	0.835194	-0.0133938	1.69196	0.0791	Undecided
FOG 360° vs 180°	-0.01	-0.42	0.4	0.998	0.127431	-0.0207894	-0.864642	0.831331	0.5111	Undecided
