# Supplementary material for: Kinematics during turning differs in Parkinson’s disease patients with and those without freezing of gait
Source: Research Square preprint supplement (doi:10.21203/rs.3.rs-6862985/v1), 2025-07-15
Supplement: Supplementary file 4 [file 4c9b03f7febb2f203f3f4f20.xlsx]

## Sheet: Sheet1
Table 3. Variability of Spatiotemporal parameters.
Parameter SD	Elderly			PD			FOG				Differences with respect to
	Mean (95% CI)			Mean (95% CI)			Mean (95% CI)
	90°	180°	360°	90°	180°	360°	90°	180°	360°		Group	Turning amplitude
SD Speed (m/s)	0.0457	0.0381	0.0353	0.056	0.0407	0.033	0.0502	0.0442	0.0332		90°: EPDFOG | EFOG	E: 90°180°360° | 90°360°
	0.0382	0.0329	0.0315	0.0457	0.0331	0.0284	0.0419	0.0363	0.0299		180°: EPDFOG | EFOG	PD: 90°>180°360° | 90°>360°
	0.053	0.0442	0.0394	0.0654	0.0479	0.0378	0.0601	0.0524	0.0366		360°: EPDFOG | EFOG	FOG: 90°180°360° | 90°>360°
SD Turning Duration (s)	0.2706	0.2695	0.3683	0.2938	0.2953	0.3135	0.2926	0.2743	0.3364		90°: EPDFOG | EFOG	E: 90°180°360° | 90°360°
	0.2075	0.2077	0.3094	0.2158	0.2595	0.2845	0.2163	0.2044	0.2531		180°: EPDFOG | EFOG	PD: 90°180°360° | 90°360°
	0.3434	0.3333	0.4537	0.3633	0.3359	0.3463	0.3729	0.3337	0.4307		360°: EPDFOG | EFOG	FOG: 90°180°360°| 90°360°
SD Number of Steps	0.5036	0.4806	0.5901	0.5271	0.5357	0.527	0.5507	0.5092	0.6094		90°: EPDFOG | EFOG	E: 90°180°360° | 90°360°
	0.4138	0.3486	0.5148	0.378	0.499	0.4703	0.3967	0.3617	0.4764		180°: EPDFOG | EFOG	PD: 90°180°360° | 90°360°
	0.6184	0.6046	0.6737	0.6406	0.5784	0.5864	0.6939	0.6173	0.7521		360°: EPDFOG | EFOG	FOG: 90°180°360° | 90°360°
SD Cadence (steps/min)	3.911	3.8526	3.5287	4.2922	3.1299	2.0055	3.9323	2.9576	2.429		90°: EPDFOG | EFOG	E: 90°180°360° | 90°360°
	3.1323	2.5658	2.5757	3.3505	2.2045	1.529	2.7872	2.3646	1.9675		180°: EPDFOG | EFOG	PD: 90°180°360° | 90°>360°
	4.8711	5.3269	4.5958	5.3431	4.2566	2.6155	4.9995	3.5531	2.9741		360°: EPDFOG | EFOG	FOG: 90°180°360° | 90°>360°
SD Stride Length	0.0736	0.1097	0.1128	0.0838	0.0858	0.0958	0.0852	0.0864	0.0894		90°: EPDFOG | EFOG	E: 90°<180°360° | 90°<360°
Internal Leg (m)	0.0571	0.0962	0.0916	0.0657	0.0662	0.0805	0.0677	0.0754	0.0826		180°: EPDFOG | EFOG	PD: 90°180°360° | 90°360°
	0.0918	0.1252	0.1334	0.108	0.1076	0.1113	0.1019	0.0986	0.0969		360°: EPDFOG | EFOG	FOG: 90°180°360° | 90°360°
SD Stride Length	0.0712	0.0873	0.0701	0.0828	0.0977	0.0813	0.0714	0.0723	0.0731		90°: EPDFOG | EFOG	E: 90°180°360° | 90°360°
External Leg (m)	0.0517	0.0667	0.0611	0.0651	0.0748	0.0677	0.0533	0.0639	0.0616		180°: EPDFOG | EFOG	PD: 90°180°360° | 90°360°
	0.0935	0.1106	0.0791	0.1036	0.1209	0.095	0.0879	0.0805	0.0911		360°: EPDFOG | EFOG	FOG: 90°180°360° | 90°360°
SD Step Length	0.0619	0.0991	0.0828	0.0605	0.0753	0.0629	0.0578	0.0741	0.0635		90°: EPDFOG | EFOG	E: 90°<180°360° | 90°360°
Internal Leg (m)	0.0496	0.0845	0.0722	0.0465	0.0535	0.0501	0.0429	0.0628	0.0576		180°: EPDFOG | EFOG	PD: 90°180°360° | 90°360°
	0.073	0.1166	0.0951	0.0761	0.0983	0.0775	0.0732	0.0866	0.0695		360°: EPDFOG | EFOG	FOG: 90°180°360° | 90°360°
SD Step Length	0.0475	0.0525	0.0421	0.0522	0.0682	0.0577	0.0405	0.0396	0.0392		90°: EPDFOG | EFOG	E: 90°180°360° | 90°360°
External Leg (m)	0.0349	0.0417	0.0336	0.0406	0.05	0.0476	0.0309	0.0352	0.0328		180°: EPD>FOG | EFOG	PD: 90°180°360° | 90°360°
	0.0595	0.065	0.0515	0.0652	0.0861	0.0683	0.0493	0.0445	0.0469		360°: EPDFOG | EFOG	FOG: 90°180°360° | 90°360°
SD Stride Width	0.0442	0.0377	0.0369	0.0386	0.0375	0.0336	0.0283	0.0249	0.0253		90°: EPDFOG | EFOG	E: 90°180°360° | 90°360°
Internal Leg (m)	0.0376	0.0306	0.0328	0.0276	0.0269	0.0261	0.0216	0.0204	0.0205		180°: EPDFOG | EFOG	PD: 90°180°360° | 90°360°
	0.052	0.0448	0.0407	0.0574	0.053	0.044	0.0371	0.0295	0.0307		360°: EPDFOG | EFOG	FOG: 90°180°360° | 90°360°
SD Stride Width	0.0353	0.0504	0.0449	0.0427	0.0362	0.0368	0.0321	0.0345	0.0399		90°: EPDFOG | EFOG	E: 90°<180°360° | 90°360°
External Leg (m)	0.0266	0.0406	0.0391	0.0307	0.0283	0.0308	0.0238	0.0282	0.0308		180°: EPDFOG | EFOG	PD: 90°180°360° | 90°360°
	0.0452	0.0612	0.052	0.0579	0.0444	0.0434	0.0403	0.0424	0.0505		360°: EPDFOG | EFOG	FOG: 90°180°360° | 90°360°
SD Gait Cycle Duration	0.0429	0.0678	0.0608	0.0569	0.063	0.0522	0.0425	0.0475	0.0531		90°: EPDFOG | EFOG	E: 90°<180°360° | 90°360°
Internal Leg (s)	0.0327	0.0521	0.0499	0.0411	0.0458	0.0414	0.0328	0.04	0.0445		180°: EPDFOG | EFOG	PD: 90°180°360° | 90°360°
	0.0529	0.0874	0.071	0.0779	0.08	0.0624	0.0539	0.0557	0.0629		360°: EPDFOG | EFOG	FOG: 90°180°360° | 90°360°
SD Gait Cycle Duration	0.0411	0.0549	0.0522	0.0467	0.0614	0.0488	0.0465	0.0478	0.0441		90°: EPDFOG | EFOG	E: 90°180°360° | 90°360°
External Leg (s)	0.0268	0.0427	0.0409	0.0347	0.0437	0.0371	0.0331	0.0388	0.0347		180°: EPDFOG | EFOG	PD: 90°180°360° | 90°360°
	0.0561	0.0702	0.0632	0.0596	0.0797	0.0611	0.0642	0.0563	0.0559		360°: EPDFOG | EFOG	FOG: 90°180°360° | 90°360°
SD Stance Duration	0.0329	0.0488	0.0466	0.047	0.0497	0.0446	0.0389	0.0394	0.0439		90°: EPDFOG | EFOG	E: 90°<180°360° | 90°<360°
Internal Leg (s)	0.0266	0.0388	0.0392	0.0398	0.0397	0.036	0.0322	0.0308	0.036		180°: EPDFOG | EFOG	PD: 90°180°360° | 90°360°
	0.0403	0.0592	0.0543	0.054	0.0583	0.0548	0.0478	0.0467	0.052		360°: EPDFOG | EFOG	FOG: 90°180°360° | 90°360°
SD Stance Duration	0.0319	0.0413	0.041	0.0421	0.0474	0.0412	0.0352	0.0395	0.0361		90°: EPDFOG | EFOG	E: 90°<180°360° | 90°<360°
External Leg (s)	0.0251	0.0335	0.033	0.0339	0.036	0.0318	0.0266	0.0323	0.0293		180°: EPDFOG | EFOG	PD: 90°180°360° | 90°360°
	0.039	0.0498	0.0486	0.0516	0.0595	0.0502	0.0438	0.048	0.0433		360°: EPDFOG | EFOG	FOG: 90°180°360° | 90°360°
SD Initial double support duration	0.0149	0.0236	0.0236	0.0195	0.0236	0.0262	0.0181	0.0226	0.0285		90°: EPDFOG | EFOG	E: 90°<180°360° | 90°<360°
Internal Leg (s)	0.0118	0.0201	0.0192	0.0141	0.0178	0.0203	0.0144	0.0179	0.023		180°: EPDFOG | EFOG	PD: 90°180°360° | 90°360°
	0.018	0.0271	0.0283	0.0253	0.0302	0.0328	0.0218	0.0285	0.0348		360°: EPDFOG | EFOG	FOG: 90°180°360° | 90°<360°
SD Initial double support duration	0.0131	0.0191	0.0174	0.0189	0.0239	0.022	0.0172	0.0218	0.0199		90°: EPDFOG | EFOG	E: 90°<180°360° | 90°360°
External Leg (s)	0.0103	0.0148	0.0149	0.0166	0.0194	0.0178	0.0122	0.0172	0.0161		180°: EPDFOG | EFOG	PD: 90°180°360° | 90°360°
	0.0158	0.0233	0.0202	0.0216	0.0287	0.0261	0.0226	0.0261	0.0239		360°: EPDFOG | EFOG	FOG: 90°180°360° | 90°360°
SD Stance/Cycle ratio	1.4075	1.8984	1.967	1.7844	2.1627	2.084	1.6097	1.8823	2.2082		90°: EPDFOG | EFOG	E: 90°180°360° | 90°360°
Internal Leg (%)	1.1327	1.5961	1.7258	1.3326	1.6527	1.6875	1.0983	1.4805	1.8388		180°: EPDFOG | EFOG	PD: 90°180°360° | 90°360°
	1.7724	2.2312	2.2724	2.2511	2.6814	2.4897	2.1847	2.2492	2.5757		360°: EPDFOG | EFOG	FOG: 90°180°360° | 90°<360°
SD Stance/Cycle ratio	1.1751	1.8664	1.5563	1.5986	1.7694	1.8713	1.3001	1.7272	1.7026		90°: EPDFOG | EFOG	E: 90°<180°360° | 90°360°
External Leg (%)	0.9278	1.4775	1.3792	1.169	1.3325	1.5159	0.9041	1.4238	1.4393		180°: EPDFOG | EFOG	PD: 90°180°360° | 90°360°
	1.4201	2.4024	1.7459	2.0818	2.311	2.315	1.7652	2.0383	1.9825		360°: EPDFOG | EFOG	FOG: 90°180°360° | 90°360°
