# Supplementary material for: Kinematics during turning differs in Parkinson’s disease patients with and those without freezing of gait
Source: Research Square preprint supplement (doi:10.21203/rs.3.rs-6862985/v1), 2025-07-15
Supplement: Supplementary file 5 [file 6e64a182f859254ec7f115a6.xlsx]

## Sheet: Sheet1
Table 2. Spatiotemporal parameters.
Parameter	Elderly			PD			FOG				Differences with respect to
	Mean (95% CI)			Mean (95% CI)			Mean (95% CI)
	90°	180°	360°	90°	180°	360°	90°	180°	360°		Group	Turning amplitude
Speed (m/s)	0.95	0.808	0.755	0.855	0.74	0.693	0.754	0.692	0.648		90°: EPDFOG | E>FOG	E: 90°>180°>360°
	0.925	0.781	0.733	0.82	0.706	0.658	0.718	0.658	0.62		180°: EPDFOG | EFOG	PD: 90°>180°360° | 90°>360°
	0.976	0.834	0.778	0.889	0.771	0.726	0.792	0.726	0.676		360°: EPDFOG | EFOG	FOG: 90°>180°360° | 90°>360°
Turning Duration (s)	1.488	2.467	4.482	1.52	2.594	5.062	1.546	2.749	5.485		90°: EPDFOG | EFOG	E: 90°<180°<360°
	1.419	2.396	4.342	1.453	2.494	4.873	1.479	2.656	5.294		180°: EPDFOG | EFOG	PD: 90°<180°<360°
	1.562	2.536	4.632	1.588	2.703	5.25	1.609	2.845	5.725		360°: EPDFOG | E<FOG	FOG: 90°<180°<360°
Number of Steps	3.756	5.464	9.105	3.761	5.678	10.114	3.92	6.112	11.311		90°: EPDFOG | EFOG	E: 90°<180°<360°
	3.622	5.345	8.919	3.636	5.511	9.761	3.782	5.944	10.955		180°: EPDFOG | EFOG	PD: 90°<180°<360°
	3.878	5.584	9.302	3.886	5.856	10.421	4.046	6.281	11.689		360°: EPD<FOG | E<FOG	FOG: 90°<180°<360°
Cadence (steps/min)	111.512	109.357	109.789	109.531	108.691	108.614	113.532	111.914	113.467		90°: EPDFOG | EFOG	E: 90°180°≈360° | 90°≈360°
	109.214	106.933	107.324	107.044	106.618	106.508	111.925	110.261	112.017		180°: EPDFOG | EFOG	PD: 90°≈180°≈360° | 90°≈360°
	113.85	111.998	112.686	112	110.706	110.67	115.142	113.573	114.996		360°: EPDFOG | EFOG	FOG: 90°180°360° | 90°≈360°
Stride Length	0.877	0.714	0.701	0.852	0.734	0.729	0.654	0.599	0.549		90°: EPD>FOG | E>FOG	E: 90°>180°≈360° | 90>360°
Internal Leg (m)	0.853	0.692	0.686	0.806	0.702	0.707	0.622	0.575	0.535		180°: EPDFOG | EFOG	PD: 90°180°≈360° | 90°360°
	0.902	0.736	0.718	0.893	0.761	0.75	0.687	0.624	0.563		360°: EPD>FOG | EFOG	FOG: 90°180°360° | 90°>360°
Stride Length	1.041	0.937	0.94	0.912	0.764	0.757	0.858	0.774	0.765		90°: EPDFOG | E>FOG	E: 90°>180°≈360° | 90°>360°
External Leg (m)	1.009	0.914	0.927	0.862	0.734	0.736	0.812	0.749	0.746		180°: EPDFOG | EFOG	PD: 90°>180°≈360° | 90°>360°
	1.071	0.958	0.954	0.96	0.792	0.78	0.905	0.797	0.783		360°: EPDFOG | EFOG	FOG: 90°180°≈360° | 90°360°
Step Length	0.428	0.332	0.313	0.42	0.369	0.368	0.292	0.262	0.225		90°: EPD>FOG | E>FOG	E: 90°>180°360° | 90°>360°
Internal Leg (m)	0.411	0.314	0.303	0.392	0.349	0.354	0.268	0.246	0.217		180°: EPD>FOG | EFOG	PD: 90°>180°≈360° | 90°>360°
	0.445	0.35	0.323	0.447	0.391	0.381	0.315	0.276	0.234		360°: EPD>FOG | EFOG	FOG: 90°180°360° | 90°>360°
Step Length	0.546	0.497	0.502	0.446	0.369	0.364	0.449	0.419	0.418		90°: EPDFOG | EFOG	E: 90°>180°≈360° | 90°>360°
External Leg (m)	0.525	0.483	0.493	0.416	0.345	0.349	0.427	0.405	0.409		180°: EPDFOG | EFOG	PD: 90°>180°≈360° | 90°>360°
	0.564	0.511	0.51	0.476	0.393	0.381	0.468	0.431	0.428		360°: E>PDFOG | EFOG	FOG: 90°≈180°≈360° | 90°≈360°
Stride Width	0.332	0.322	0.325	0.21	0.177	0.179	0.277	0.272	0.268		90°: E>PDFOG | EFOG	E: 90°≈180°≈360° | 90°≈360°
Internal Leg (m)	0.318	0.315	0.319	0.179	0.155	0.162	0.266	0.264	0.263		180°: E>PDFOG | EFOG	PD: 90°180°≈360° | 90°360°
	0.344	0.329	0.331	0.243	0.199	0.195	0.289	0.28	0.273		360°: E>PDFOG | EFOG	FOG: 90°≈180°≈360° | 90°≈360°
Stride Width	-0.024	-0.031	-0.034	0.132	0.133	0.114	0.057	0.043	0.052		90°: E<PDFOG | EFOG	E: 90°≈180°≈360° | 90°≈360°
External Leg (m)	-0.037	-0.042	-0.041	0.096	0.11	0.097	0.046	0.033	0.045		180°: E<PDFOG | EFOG	PD: 90°≈180°≈360° | 90°≈360°
	-0.009	-0.019	-0.027	0.168	0.158	0.13	0.068	0.053	0.057		360°: E<PDFOG | EFOG	FOG: 90°180°≈360° | 90°≈360°
Gait Cycle Duration	1.087	1.103	1.108	1.082	1.11	1.112	1.057	1.074	1.062		90°: EPDFOG | EFOG	E: 90°180°≈360° | 90°360°
Internal Leg (s)	1.062	1.081	1.093	1.055	1.093	1.099	1.04	1.061	1.054		180°: EPDFOG | EFOG	PD: 90°180°≈360° | 90°360°
	1.111	1.123	1.122	1.11	1.13	1.124	1.073	1.089	1.071		360°: EPDFOG | EFOG	FOG: 90°180°360° | 90°≈360°
Gait Cycle Duration	1.073	1.107	1.106	1.107	1.104	1.108	1.056	1.074	1.064		90°: EPDFOG | EFOG	E: 90°180°≈360° | 90°360°
External Leg (s)	1.049	1.087	1.091	1.081	1.088	1.097	1.039	1.061	1.056		180°: EPDFOG | EFOG	PD: 90°≈180°≈360° | 90°≈360°
	1.098	1.126	1.12	1.135	1.122	1.12	1.072	1.089	1.072		360°: EPDFOG | EFOG	FOG: 90°180°360° | 90°≈360°
Stance Duration	0.687	0.718	0.72	0.702	0.717	0.72	0.698	0.714	0.712		90°: EPDFOG | EFOG	E: 90°<180°≈360° | 90°<360°
Internal Leg (s)	0.676	0.706	0.711	0.69	0.707	0.712	0.688	0.706	0.705		180°: EPDFOG | EFOG	PD: 90°180°≈360° | 90°360°
	0.7	0.73	0.729	0.716	0.727	0.727	0.708	0.724	0.719		360°: EPDFOG | EFOG	FOG: 90°180°≈360° | 90°360°
Stance Duration	0.667	0.69	0.684	0.707	0.712	0.714	0.688	0.694	0.684		90°: EPDFOG | EFOG	E: 90°180°≈360° | 90°360°
External Leg (s)	0.655	0.679	0.674	0.692	0.7	0.705	0.678	0.685	0.678		180°: EPDFOG | EFOG	PD: 90°≈180°≈360° | 90°≈360°
	0.68	0.703	0.693	0.724	0.723	0.722	0.698	0.705	0.691		360°: EPDFOG | EFOG	FOG: 90°≈180°360° | 90°360°
Initial double support duration	0.141	0.158	0.158	0.155	0.165	0.169	0.162	0.171	0.173		90°: EPDFOG | EFOG	E: 90°<180°≈360° | 90°<360°
Internal Leg (s)	0.136	0.153	0.154	0.149	0.161	0.165	0.155	0.166	0.169		180°: EPDFOG | EFOG	PD: 90°180°≈360° | 90°360°
	0.146	0.163	0.161	0.161	0.17	0.173	0.168	0.176	0.177		360°: EPDFOG | EFOG	FOG: 90°180°≈360° | 90°360°
Initial double support duration	0.132	0.147	0.144	0.142	0.156	0.156	0.152	0.164	0.16		90°: EPDFOG | EFOG	E: 90°<180°≈360° | 90°360°
External Leg (s)	0.126	0.141	0.14	0.137	0.152	0.153	0.146	0.158	0.157		180°: EPDFOG | EFOG	PD: 90°<180°≈360° | 90°360°
	0.138	0.152	0.148	0.147	0.162	0.159	0.158	0.17	0.164		360°: EPDFOG | EFOG	FOG: 90°180°360° | 90°360°
Stance/Cycle ratio	62.11	64.525	65.143	62.322	64.055	64.744	64.213	66.205	66.842		90°: EPDFOG | EFOG	E: 90°<180°360° | 90°<360°
Internal Leg (%)	61.662	64.117	64.88	61.806	63.638	64.406	63.612	65.839	66.518		180°: EPDFOG | EFOG	PD: 90°<180°360° | 90°<360°
	62.531	64.906	65.413	62.873	64.522	65.06	64.808	66.585	67.146		360°: EPDFOG | EFOG	FOG: 90°<180°360° | 90°<360°
Stance/Cycle ratio	61.021	61.482	61.428	61.977	63.626	64.066	63.55	64.033	64.045		90°: EPDFOG | EFOG	E: 90°180°≈360° | 90°360°
External Leg (%)	60.592	60.989	61.162	61.218	63.116	63.738	62.933	63.486	63.708		180°: EPDFOG | EFOG	PD: 90°<180°360° | 90°<360°
	61.494	61.932	61.699	62.722	64.127	64.413	64.162	64.527	64.366		360°: EPDFOG | EFOG	FOG: 90°≈180°≈360° | 90°≈360°
