# Supplementary material for: Kinematics during turning differs in Parkinson’s disease patients with and those without freezing of gait
Source: Research Square preprint supplement (doi:10.21203/rs.3.rs-6862985/v1), 2025-07-15
Supplement: Supplementary file 6 [file 88f7c6f4ee16411ddaaaa5bf.xlsx]

## Sheet: Sheet1
Demographic Data
	Elderly	PD	FOG
Gender (male, female)	4 males	6 males	5 males
Age (years)	72 ± 5	71 ± 7	72 ± 3
BMI (kg/m2)	26.4 ± 6.4	23.3 ± 4.2	26.5 ± 2.9
H&Y	NA	2.25 ± 0.26	2.7 ± 0.48
FOG-Q	NA	1.6 ± 1.4	11.7 ± 3.9
Clinical Predominant Side (right, left)	NA	6 right	5 right
UPDRS I	NA	11.5 ± 5.4	14.1 ± 9.0
UPDRS II	NA	10.7 ± 6.4	14.9 ± 8.5
UPDRS III	NA	21.1 ± 5.1	37.9 ± 12.5
UPDRS IV	NA	1.7 ± 2.2	4.2 ± 2.5
UPDRS Total	NA	45 ± 11.4	71.1 ± 28.4
