# Supplementary material for: Kinematics during turning differs in Parkinson’s disease patients with and those without freezing of gait
Source: Research Square preprint supplement (doi:10.21203/rs.3.rs-6862985/v1), 2025-07-15
Supplement: Supplementary file 7 [file ab339cb4df897e277cd3adab.xlsx]

## Sheet: Sheet1
Speed
	Estimate	(-95% CI)	(+95% CI)	p-Value	Bayes Factor	Cohen's d	(-95% CI)	(+95% CI)	HDI ROPE 95%	H0 Hypothesis
Group
90° PD vs Elderly	-0.1	-0.23	0.04	0.374	0.108025	-1.90367	-4.5886	0.736135	0.1565	Undecided
90° FOG vs Elderly	-0.2	-0.33	-0.06	0.021	1.92106	-3.92348	-6.64399	-1.26343	0	Rejected
90° FOG vs PD	-0.1	-0.24	0.03	0.332	0.134117	-1.98741	-4.67247	0.687407	0.1398	Undecided
180° PD vs Elderly	-0.07	-0.2	0.06	0.57	0.0690512	-1.36758	-3.95763	1.23117	0.2476	Undecided
180° FOG vs Elderly	-0.11	-0.25	0.02	0.243	0.178637	-2.25864	-4.9348	0.33784	0.0965	Undecided
180° FOG vs PD	-0.05	-0.18	0.09	0.724	0.0573356	-0.937413	-3.55379	1.7607	0.3194	Undecided
360° PD vs Elderly	-0.06	-0.19	0.08	0.688	0.0615572	-1.17464	-3.86437	1.48858	0.2913	Undecided
360° FOG vs Elderly	-0.11	-0.24	0.03	0.244	0.164907	-2.13429	-4.76391	0.515096	0.1051	Undecided
360° FOG vs PD	-0.05	-0.18	0.09	0.717	0.0564209	-0.912067	-3.58796	1.79149	0.3185	Undecided
Turning Amplitude
Elderly 180° vs 90°	-0.15	-0.16	-0.13	< .001	3.80305e+18	-2.89449	-3.23568	-2.5549	0	Rejected
Elderly 360° vs 90°	-0.2	-0.21	-0.18	< .001	4913746000000000	-3.95003	-4.3188	-3.58506	0	Rejected
Elderly 360° vs 180°	-0.05	-0.07	-0.04	< .001	3.39294e+19	-1.05685	-1.35785	-0.758003	0	Rejected
PD 180° vs 90°	-0.12	-0.13	-0.1	< .001	1.18542e+16	-2.29108	-2.60393	-1.9743	0	Rejected
PD 360° vs 90°	-0.16	-0.18	-0.15	< .001	409475200000000	-3.18951	-3.52522	-2.85118	0	Rejected
PD 360° vs 180°	-0.05	-0.06	-0.03	< .001	6.87942e+21	-0.902212	-1.20163	-0.606154	0.0404	Undecided
FOG 180° vs 90°	-0.06	-0.08	-0.05	< .001	4.09146e+16	-1.2191	-1.52246	-0.916009	0	Rejected
FOG 360° vs 90°	-0.11	-0.12	-0.09	< .001	3.46024e+19	-2.11161	-2.42568	-1.80125	0	Rejected
FOG 360° vs 180°	-0.04	-0.06	-0.03	< .001	4.46671e+19	-0.889265	-1.18721	-0.592174	0.0508	Undecided
Turning Duration
	Estimate	(-95% CI)	(+95% CI)	p-Value	Bayes Factor	Cohen's d	(-95% CI)	(+95% CI)	HDI ROPE 95%	H0 Hypothesis
Group
90° PD vs Elderly	0.04	-0.35	0.44	0.983	0.125931	0.0875035	-0.73876	0.94729	0.9274	Undecided
90° FOG vs Elderly	0.05	-0.34	0.46	0.975	0.120978	0.105079	-0.731721	0.970312	0.923	Undecided
90° FOG vs PD	0.03	-0.37	0.43	0.972	0.130636	0.0638866	-0.785249	0.908846	0.9293	Undecided
180° PD vs Elderly	0.15	-0.24	0.56	0.713	0.171844	0.323265	-0.51319	1.17959	0.822	Undecided
180° FOG vs Elderly	0.3	0.2	-0.09	0.35	0.355522	0.637705	-0.199756	1.49445	0.5428	Undecided
180° FOG vs PD	0.17	-0.21	0.56	0.707	0.173131	0.365992	-0.436562	1.19037	0.7924	Undecided
360° PD vs Elderly	0.6	0.21	1	0.015	8.65084	1.2854	0.43552	2.13361	0.0507	Undecided
360° FOG vs Elderly	1.03	0.63	1.42	< .001	412.879	2.18429	1.3388	3.04425	0	Rejected
360° FOG vs PD	0.47	0.09	0.88	0.053	2.26662	0.998843	0.186477	1.86991	0.2128	Undecided
Turning Amplitude
Elderly 180° vs 90°	0.97	0.83	1.11	< .001	1158095000000000	2.06595	1.7443	2.38622	0	Rejected
Elderly 360° vs 90°	2.99	2.85	3.13	< .001	3675599000000000	6.3602	5.92076	6.79347	0	Rejected
Elderly 360° vs 180°	2.02	1.88	2.16	< .001	1.64025e+18	4.29826	3.93214	4.67041	0	Rejected
PD 180° vs 90°	1.07	0.94	1.21	< .001	971992300000000	2.28152	1.96489	2.59685	0	Rejected
PD 360° vs 90°	3.54	3.4	3.67	< .001	1.11499e+43	7.5221	7.0362	8.00443	0	Rejected
PD 360° vs 180°	2.46	2.33	2.6	< .001	1.65645e+16	5.24087	4.84309	5.63765	0	Rejected
FOG 180° vs 90°	1.21	1.07	1.35	< .001	6321382000000000	2.56648	2.24436	2.88826	0	Rejected
FOG 360° vs 90°	3.94	3.8	4.08	< .001	1.87872e+18	8.38407	7.86017	8.91042	0	Rejected
FOG 360° vs 180°	2.74	2.6	2.87	< .001	4.40599e+20	5.81716	5.39821	6.23296	0	Rejected
Number of Steps
	Estimate	(-95% CI)	(+95% CI)	p-Value	Bayes Factor	Cohen's d	(-95% CI)	(+95% CI)	HDI ROPE 95%	H0 Hypothesis
Group
90° PD vs Elderly	0.09	-0.52	0.72	0.962	0.204429	0.117969	-0.652054	0.900213	0.9563	Undecided
90° FOG vs Elderly	0.23	-0.38	0.84	0.754	0.266512	0.289176	-0.476256	1.05088	0.8843	Undecided
90° FOG vs PD	0.2	-0.41	0.83	0.796	0.238887	0.253839	-0.517151	1.0315	0.906	Undecided
180° PD vs Elderly	0.33	-0.3	0.96	0.573	0.337526	0.405287	-0.368945	1.20085	0.8114	Undecided
180° FOG vs Elderly	0.74	0.13	1.37	0.057	3.468	0.924577	0.167813	1.69776	0.2943	Undecided
180° FOG vs PD	0.52	-0.11	1.16	0.265	0.765353	0.646327	-0.138429	1.4471	0.5871	Undecided
360° PD vs Elderly	1.1	0.5	1.73	0.003	81.5601	1.37301	0.616426	2.14924	0.0288	Undecided
360° FOG vs Elderly	2.27	1.65	2.93	< .001	2427211000000000	2.82943	2.04359	3.65688	0	Rejected
360° FOG vs PD	1.39	0.78	2.05	< .001	120499	1.73148	0.960793	2.56239	0	Rejected
Turning Amplitude
Elderly 180° vs 90°	1.71	1.47	1.96	< .001	1773564000000000	2.12632	1.80236	2.44404	0	Rejected
Elderly 360° vs 90°	5.36	5.12	5.6	< .001	4640988000000000	6.66757	6.21824	7.11038	0	Rejected
Elderly 360° vs 180°	3.66	3.42	3.9	< .001	6.4356e+16	4.55845	4.17931	4.93451	0	Rejected
PD 180° vs 90°	1.9	1.67	2.14	< .001	2004278000000000	2.36766	2.05967	2.67789	0	Rejected
PD 360° vs 90°	6.32	6.08	6.56	< .001	5.86546e+17	7.86393	7.38176	8.36806	0	Rejected
PD 360° vs 180°	4.43	4.19	4.66	< .001	2.51498e+16	5.50714	5.10759	5.90747	0	Rejected
FOG 180° vs 90°	2.17	1.94	2.41	< .001	1987932000000000	2.70293	2.3787	3.02943	0	Rejected
FOG 360° vs 90°	7.36	7.13	7.59	< .001	4.32937e+30	9.15116	8.60533	9.70972	0	Rejected
FOG 360° vs 180°	5.19	4.95	5.43	< .001	1921075000000000	6.45543	6.01199	6.89841	0	Rejected
Cadence
	Estimate	(-95% CI)	(+95% CI)	p-Value	Bayes Factor	Cohen's d	(-95% CI)	(+95% CI)	HDI ROPE 95%	H0 Hypothesis
Group
90° PD vs Elderly	0.27	-2.83	3.42	0.987	1.0202	0.0670361	-0.711167	0.857575	0.8448	Undecided
90° FOG vs Elderly	0.25	-2.91	3.4	0.986	1.00109	0.0620099	-0.729618	0.855581	0.8361	Undecided
90° FOG vs PD	0.28	-2.9	3.43	0.971	1.00181	0.0694088	-0.724846	0.862413	0.8391	Undecided
180° PD vs Elderly	0.26	-2.86	3.37	0.985	1.01706	0.0663816	-0.718259	0.845501	0.8444	Undecided
180° FOG vs Elderly	0.26	-2.87	3.42	0.99	0.993604	0.0654763	-0.722191	0.855132	0.8403	Undecided
180° FOG vs PD	0.24	-2.95	3.34	0.988	1.03319	0.0600464	-0.740171	0.839691	0.7962	Undecided
360° PD vs Elderly	0.25	-2.88	3.33	0.996	1.01511	0.0612507	-0.724112	0.8384	0.8442	Undecided
360° FOG vs Elderly	0.26	-2.9	3.42	0.986	1.04677	0.0658976	-0.72931	0.854614	0.8343	Undecided
360° FOG vs PD	0.25	-2.92	3.35	0.979	1.0112	0.0621615	-0.731654	0.839625	0.8385	Undecided
Turning Amplitude
Elderly 180° vs 90°	-1.47	-2.48	-0.47	0.019	16.7845	-0.369606	-0.623678	-0.117347	0.8997	Undecided
Elderly 360° vs 90°	-0.91	-1.9	0.09	0.185	1.67186	-0.227451	-0.478808	0.0222019	1	Accepted
Elderly 360° vs 180°	0.46	-0.52	1.42	0.639	0.478803	0.114521	-0.130828	0.35463	1	Accepted
PD 180° vs 90°	-0.87	-1.84	0.09	0.223	1.36979	-0.21838	-0.462034	0.0238825	1	Accepted
PD 360° vs 90°	-0.8	-1.76	0.2	0.288	1.07259	-0.199367	-0.44033	0.0488688	1	Accepted
PD 360° vs 180°	0.17	-0.8	1.13	0.933	0.330489	0.0423594	-0.200951	0.282152	1	Accepted
FOG 180° vs 90°	-1.53	-2.5	-0.55	0.01	30.8998	-0.383049	-0.626683	-0.138088	0.8769	Undecided
FOG 360° vs 90°	-0.18	-1.16	0.79	0.952	0.331518	-0.0452606	-0.289993	0.198125	1	Accepted
FOG 360° vs 180°	1.15	0.18	2.11	0.071	4.41059	0.287394	0.0441981	0.531452	0.9854	Undecided
Stride Length Internal Leg
	Estimate	(-95% CI)	(+95% CI)	p-Value	Bayes Factor	Cohen's d	(-95% CI)	(+95% CI)	HDI ROPE 95%	H0 Hypothesis
Group
90° PD vs Elderly	-0.02	-0.15	0.12	0.998	0.0427369	-0.157412	-1.52064	1.21985	0.4475	Undecided
90° FOG vs Elderly	-0.22	-0.36	-0.09	0.008	5.86205	-2.20393	-3.5786	-0.848715	0	Rejected
90° FOG vs PD	-0.2	-0.34	-0.06	0.016	2.86273	-2.0117	-3.41311	-0.620133	0	Rejected
180° PD vs Elderly	0.03	-0.11	0.17	0.896	0.0480499	0.30055	-1.08008	1.6529	0.4104	Undecided
180° FOG vs Elderly	-0.11	-0.25	0.02	0.254	0.16911	-1.11996	-2.47709	0.237132	0.1212	Undecided
180° FOG vs PD	-0.14	-0.28	0	0.129	0.337208	-1.4061	-2.79331	-0.0353986	0.0494	Undecided
360° PD vs Elderly	0.05	-0.09	0.19	0.705	0.059887	0.522143	-0.850565	1.88169	0.3341	Undecided
360° FOG vs Elderly	-0.13	-0.27	0	0.148	0.292509	-1.31984	-2.71563	0.0141829	0.062	Undecided
360° FOG vs PD	-0.19	-0.32	-0.05	0.025	1.72789	-1.84125	-3.18828	-0.5341	0	Rejected
Turning Amplitude
Elderly 180° vs 90°	-0.16	-0.19	-0.13	< .001	5.72275e+22	-1.60457	-1.88022	-1.33016	0	Rejected
Elderly 360° vs 90°	-0.18	-0.2	-0.16	< .001	5.17336e+23	-1.7869	-2.03361	-1.54243	0	Rejected
Elderly 360° vs 180°	-0.02	-0.04	0	0.186	0.0336118	-0.181645	-0.373433	0.0130682	1	Accepted
PD 180° vs 90°	-0.12	-0.15	-0.09	< .001	3.44995e+143	-1.17746	-1.45001	-0.906159	0	Rejected
PD 360° vs 90°	-0.11	-0.14	-0.09	< .001	2.50459e+36	-1.1296	-1.3739	-0.883454	0	Rejected
PD 360° vs 180°	0	-0.01	0.02	0.896	0.00654696	0.0464952	-0.136507	0.227591	1	Accepted
FOG 180° vs 90°	-0.05	-0.08	-0.03	< .001	11.9711	-0.542804	-0.791989	-0.292241	0.0886	Undecided
FOG 360° vs 90°	-0.09	-0.12	-0.07	< .001	4.59767e+141	-0.935583	-1.16142	-0.70911	0	Rejected
FOG 360° vs 180°	-0.04	-0.06	-0.02	< .001	105482239401	-0.393124	-0.56443	-0.223609	0.4603	Undecided
Stride Length External Leg
	Estimate	(-95% CI)	(+95% CI)	p-Value	Bayes Factor	Cohen's d	(-95% CI)	(+95% CI)	HDI ROPE 95%	H0 Hypothesis
Group
90° PD vs Elderly	-0.14	-0.29	0.01	0.167	0.267752	-1.60573	-3.30131	0.0806296	0.0692	Undecided
90° FOG vs Elderly	-0.21	-0.36	-0.06	0.03	1.42745	-2.35738	-4.06922	-0.65422	0	Rejected
90° FOG vs PD	-0.07	-0.21	0.08	0.647	0.0696334	-0.747303	-2.37495	0.927677	0.2928	Undecided
180° PD vs Elderly	-0.16	-0.3	-0.01	0.427831	0.104	-1.78462	-3.43461	-0.144068	0.0352	Undecided
180° FOG vs Elderly	-0.15	-0.3	0	0.316261	0.15	-1.67113	-3.37575	0.0411572	0.0562	Undecided
180° FOG vs PD	0.01	-0.13	0.17	0.983	0.0473859	0.166105	-1.53145	1.88627	0.4283	Undecided
360° PD vs Elderly	-0.17	-0.32	-0.03	0.061	0.691622	-1.96401	-3.62776	-0.302086	0.0131	Undecided
360° FOG vs Elderly	-0.16	-0.31	-0.02	0.079	0.568258	-1.83804	-3.44853	-0.224025	0.0244	Undecided
360° FOG vs PD	0.01	-0.14	0.16	0.965	0.0459415	0.155707	-1.52974	1.79024	0.4248	Undecided
Turning Amplitude
Elderly 180° vs 90°	-0.11	-0.13	-0.08	< .001	7.69826e+73	-1.22049	-1.51298	-0.922694	0	Rejected
Elderly 360° vs 90°	-0.1	-0.13	-0.08	< .001	5.2914e+50	-1.17605	-1.44575	-0.905969	0	Rejected
Elderly 360° vs 180°	0	-0.01	0.02	0.952	0.0060654	0.0441899	-0.161185	0.248497	1	Accepted
PD 180° vs 90°	-0.12	-0.15	-0.1	< .001	7.93049e+131	-1.38729	-1.66598	-1.11576	0	Rejected
PD 360° vs 90°	-0.14	-0.16	-0.11	< .001	1.83668e+17	-1.53439	-1.78408	-1.28241	0	Rejected
PD 360° vs 180°	-0.01	-0.03	0	0.323	0.0170494	-0.145927	-0.332058	0.0390979	1	Accepted
FOG 180° vs 90°	-0.04	-0.07	-0.02	0.002	4.14916	-0.500994	-0.770877	-0.231147	0.3363	Undecided
FOG 360° vs 90°	-0.06	-0.08	-0.03	< .001	1.19608e+16	-0.624919	-0.872634	-0.382729	0.051	Undecided
FOG 360° vs 180°	-0.01	-0.03	0	0.374	0.0135954	-0.126171	-0.303122	0.0543061	1	Accepted
Step Length Internal Leg
	Estimate	(-95% CI)	(+95% CI)	p-Value	Bayes Factor	Cohen's d	(-95% CI)	(+95% CI)	HDI ROPE 95%	H0 Hypothesis
Group
90° PD vs Elderly	0.01	-0.07	0.08	0.997	0.0240715	0.0710242	-0.902053	1.03721	0.5129	Undecided
90° FOG vs Elderly	-0.13	-0.21	-0.05	0.007	3.12357	-1.65485	-2.6578	-0.685996	0	Rejected
90° FOG vs PD	-0.13	-0.21	-0.06	0.004	6.32534	-1.71733	-2.68798	-0.756707	0	Rejected
180° PD vs Elderly	0.04	-0.03	0.12	0.485	0.0468063	0.561838	-0.40321	1.5348	0.2786	Undecided
180° FOG vs Elderly	-0.07	-0.14	0	0.179	0.130967	-0.88352	-1.82702	0.0580566	0.0937	Undecided
180° FOG vs PD	-0.11	-0.18	-0.04	0.018	1.24676	-1.43425	-2.37097	-0.469072	0	Rejected
360° PD vs Elderly	0.07	0	0.14	0.181	0.128337	0.877921	-0.0519172	1.80424	0.0957	Undecided
360° FOG vs Elderly	-0.08	-0.15	0	0.125	0.176428	-0.980569	-1.94133	-0.0304346	0.0671	Undecided
360° FOG vs PD	-0.14	-0.22	-0.07	< .001	170.38	-1.84771	-2.81045	-0.89923	0	Rejected
Turning Amplitude
Elderly 180° vs 90°	-0.09	-0.11	-0.07	< .001	1.14713e+149	-1.18495	-1.45679	-0.918252	0	Rejected
Elderly 360° vs 90°	-0.11	-0.13	-0.1	< .001	2.94844e+19	-1.46374	-1.71144	-1.21734	0	Rejected
Elderly 360° vs 180°	-0.02	-0.04	-0.01	0.018	0.280489	-0.279473	-0.475893	-0.0848511	0.6642	Undecided
PD 180° vs 90°	-0.05	-0.08	-0.03	< .001	3962787000000000	-0.693538	-0.963864	-0.420871	0	Rejected
PD 360° vs 90°	-0.05	-0.07	-0.03	< .001	29915570	-0.647598	-0.894992	-0.398055	0	Rejected
PD 360° vs 180°	0	-0.01	0.02	0.883	0.00519584	0.0445632	-0.142392	0.227411	1	Accepted
FOG 180° vs 90°	-0.03	-0.05	-0.01	0.006	1.16609	-0.405067	-0.654689	-0.161643	0.2423	Undecided
FOG 360° vs 90°	-0.06	-0.08	-0.04	< .001	2.39893e+83	-0.791565	-1.0193	-0.568462	0	Rejected
FOG 360° vs 180°	-0.03	-0.04	-0.02	< .001	10.445	-0.385169	-0.553859	-0.213831	0.2074	Undecided
Step Length External Leg
	Estimate	(-95% CI)	(+95% CI)	p-Value	Bayes Factor	Cohen's d	(-95% CI)	(+95% CI)	HDI ROPE 95%	H0 Hypothesis
Group
90° PD vs Elderly	-0.11	-0.2	-0.01	0.086	0.324737	-2.03287	-3.8372	-0.234068	0.0206	Undecided
90° FOG vs Elderly	-0.11	-0.21	-0.02	0.067	0.430034	-2.12078	-3.9213	-0.344286	0.0068	Undecided
90° FOG vs PD	0	-0.1	0.09	0.973	0.0297149	-0.087204	-1.85396	1.6992	0.433	Undecided
180° PD vs Elderly	-0.12	-0.21	-0.02	0.061	0.466889	-2.19794	-3.97485	-0.414293	0.0061	Undecided
180° FOG vs Elderly	-0.07	-0.16	0.02	0.323	0.0901699	-1.30286	-3.05857	0.439033	0.1579	Undecided
180° FOG vs PD	0.05	-0.05	0.14	0.577	0.0508662	0.896035	-0.903273	2.68912	0.2603	Undecided
360° PD vs Elderly	-0.13	-0.22	-0.04	0.028	1.04093	-2.46344	-4.20919	-0.691311	0	Rejected
360° FOG vs Elderly	-0.08	-0.17	0.02	0.233	0.118545	-1.43099	-3.18389	0.349432	0.1078	Undecided
360° FOG vs PD	0.06	0.04	0.23	0.51	0.0577721	1.03951	-0.731994	2.80721	0.2268	Undecided
Turning Amplitude
Elderly 180° vs 90°	-0.05	-0.07	-0.04	< .001	6.22853e+19	-0.980227	-1.27651	-0.686325	0	Rejected
Elderly 360° vs 90°	-0.05	-0.06	-0.03	< .001	2.30731e+16	-0.886035	-1.15778	-0.617198	0	Rejected
Elderly 360° vs 180°	0.01	-0.01	0.02	0.635	0.0053763	0.0952117	-0.106798	0.295475	1	Accepted
PD 180° vs 90°	-0.06	-0.08	-0.05	< .001	1.14844e+46	-1.14124	-1.41293	-0.867897	0	Rejected
PD 360° vs 90°	-0.07	-0.08	-0.06	< .001	5.60298e+66	-1.34615	-1.59399	-1.09354	0	Rejected
PD 360° vs 180°	-0.01	-0.02	0	0.092	0.0341917	-0.204295	-0.389336	-0.0214219	1	Accepted
FOG 180° vs 90°	-0.01	-0.02	0.01	0.53	0.00880433	-0.16188	-0.442886	0.115459	1	Accepted
FOG 360° vs 90°	-0.01	-0.03	0	0.232	0.0190271	-0.218212	-0.469687	0.0372687	1	Accepted
FOG 360° vs 180°	0	-0.01	0.01	0.807	0.0037	-0.0552903	-0.232753	0.123746	1	Accepted
Stride Width Internal Leg
	Estimate	(-95% CI)	(+95% CI)	p-Value	Bayes Factor	Cohen's d	(-95% CI)	(+95% CI)	HDI ROPE 95%	H0 Hypothesis
Group
90° PD vs Elderly	-0.14	-0.24	-0.05	0.017	1.69081	-4.02196	-6.78851	-1.34887	0	Rejected
90° FOG vs Elderly	-0.06	-0.15	0.04	0.457	0.0637193	-1.57798	-4.28754	1.07528	0.1931	Undecided
90° FOG vs PD	0.09	-0.01	0.18	0.207	0.147568	2.44289	-0.228352	5.19674	0.07	Undecided
180° PD vs Elderly	-0.16	-0.25	-0.06	0.007	4.04209	-4.42241	-7.10088	-1.80311	0	Rejected
180° FOG vs Elderly	-0.05	-0.14	0.05	0.568	0.0499688	-1.34861	-3.99899	1.35941	0.2353	Undecided
180° FOG vs PD	0.11	0.01	0.2	0.088	0.334414	3.0433	0.265282	5.7282	0.0213	Undecided
360° PD vs Elderly	-0.16	-0.26	-0.07	0.004	7.82937	-4.57679	-7.2478	-1.90663	0	Rejected
360° FOG vs Elderly	-0.05	-0.15	0.05	0.561	0.0546086	-1.43491	-4.14973	1.31493	0.2203	Undecided
360° FOG vs PD	0.11	0.02	0.2	0.056	0.543197	3.12978	0.534766	5.79358	0.0068	Undecided
Turning Amplitude
Elderly 180° vs 90°	-0.01	0.02	0	0.085	0.0361994	-0.309496	-0.578477	-0.039488	1	Accepted
Elderly 360° vs 90°	-0.01	-0.02	0	0.189	0.0147384	-0.232447	-0.474891	0.0134258	1	Accepted
Elderly 360° vs 180°	0	0	0.01	0.753	0.00288859	0.0773932	-0.109969	0.265373	1	Accepted
PD 180° vs 90°	-0.02	-0.03	-0.02	< .001	496907	-0.706424	-0.980407	-0.434229	0.2999	Undecided
PD 360° vs 90°	-0.03	-0.04	-0.02	< .001	6.52837e+25	-0.78647	-1.03674	-0.540327	0.0985	Undecided
PD 360° vs 180°	0	-0.01	0	0.691	0.00302455	-0.0818213	-0.264645	0.101398	1	Accepted
FOG 180° vs 90°	0	-0.01	0.01	0.793	0.00356845	-0.0841411	-0.334986	0.164212	1	Accepted
FOG 360° vs 90°	0	-0.01	0	0.64	0.00411039	-0.110215	-0.332237	0.118813	1	Accepted
FOG 360° vs 180°	0	-0.01	0.01	0.941	0.00202	-0.0259545	-0.197554	0.143368	1	Accepted
Stride Width External Leg
	Estimate	(-95% CI)	(+95% CI)	p-Value	Bayes Factor	Cohen's d	(-95% CI)	(+95% CI)	HDI ROPE 95%	H0 Hypothesis
Group
90° PD vs Elderly	0.15	0.05	0.25	0.015	2.00375	3.51886	1.22176	5.80318	0	Rejected
90° FOG vs Elderly	0.09	-0.01	0.19	0.222	0.142961	2.03397	-0.31259	4.42521	0.0912	Undecided
90° FOG vs PD	-0.06	-0.17	0.04	0.444	0.0692155	-1.47875	-3.85716	0.818986	0.1855	Undecided
180° PD vs Elderly	0.16	0.05	0.26	0.018	1.68675	3.61618	1.18697	6.00347	0	Rejected
180° FOG vs Elderly	0.07	-0.03	0.17	0.397	0.0780409	1.59486	-0.792203	3.95083	0.1647	Undecided
180° FOG vs PD	-0.09	-0.19	0.02	0.248	0.127785	-2.00814	-4.40172	0.358664	0.0963	Undecided
360° PD vs Elderly	0.16	0.06	0.26	0.011	2.91274	3.73045	1.4275	6.02854	0	Rejected
360° FOG vs Elderly	0.08	-0.01	0.19	0.258	0.119563	1.9424	-0.311178	4.28109	0.1002	Undecided
360° FOG vs PD	-0.08	-0.18	0.02	0.31	0.0958116	-1.74593	-4.05844	0.560407	0.138	Undecided
Turning Amplitude
Elderly 180° vs 90°	-0.01	-0.02	0.01	0.661	0.00640025	-0.136394	-0.430988	0.160282	1	Accepted
Elderly 360° vs 90°	-0.01	-0.02	0	0.248	0.0156295	-0.231628	-0.506247	0.0396937	1	Accepted
Elderly 360° vs 180°	0	-0.01	0	0.664	0.0042643	-0.0966128	-0.3006	0.107309	1	Accepted
PD 180° vs 90°	0	-0.01	0.01	> .999	0.00365541	0.000372893	-0.267597	0.272261	1	Accepted
PD 360° vs 90°	0	-0.01	0.01	> .999	0.00332135	-0.00966049	-0.255295	0.23889	1	Accepted
PD 360° vs 180°	0	-0.01	0.01	0.998	0.00253005	-0.00950956	-0.198528	0.178675	1	Accepted
FOG 180° vs 90°	-0.02	-0.04	-0.01	< .001	7.21816	-0.547962	-0.822404	-0.272448	0.5671	Undecided
FOG 360° vs 90°	-0.01	-0.02	0	0.059	0.0570251	-0.303274	-0.550419	-0.0527759	1	Accepted
FOG 360° vs 180°	0.01	0	0.02	0.03	0.0840146	0.244776	0.0639039	0.419511	1	Accepted
Gait Cycle Duration Internal Leg
	Estimate	(-95% CI)	(+95% CI)	p-Value	Bayes Factor	Cohen's d	(-95% CI)	(+95% CI)	HDI ROPE 95%	H0 Hypothesis
Group
90° PD vs Elderly	0	-0.09	0.1	0.985	0.0300948	0.0777948	-1.53755	1.6646	0.3898	Undecided
90° FOG vs Elderly	-0.04	-0.13	0.06	0.749	0.0399988	-0.629144	-2.19172	0.965687	0.2923	Undecided
90° FOG vs PD	-0.04	-0.14	0.05	0.66	0.0459345	-0.700602	-2.28794	0.875635	0.2624	Undecided
180° PD vs Elderly	0.01	-0.09	0.1	0.985	0.0316351	0.105645	-1.47472	1.71049	0.383	Undecided
180° FOG vs Elderly	-0.03	-0.13	0.06	0.857	0.0368295	-0.510408	-2.15928	1.05757	0.3211	Undecided
180° FOG vs PD	-0.04	-0.13	0.06	0.697	0.0425049	-0.611287	-2.17482	0.980595	0.2939	Undecided
360° PD vs Elderly	0.01	-0.08	0.1	0.959	0.0302672	0.144885	-1.39221	1.70527	0.3811	Undecided
360° FOG vs Elderly	-0.05	-0.14	0.05	0.615	0.0483825	-0.77926	-2.34236	0.841754	0.2448	Undecided
360° FOG vs PD	-0.06	-0.15	0.04	0.48	0.056876	-0.916304	-2.48719	0.664582	0.2023	Undecided
Turning Amplitude
Elderly 180° vs 90°	0.02	0	0.04	0.075	0.0710859	0.313714	0.0446787	0.580547	0.6965	Undecided
Elderly 360° vs 90°	0.02	0	0.03	0.093	0.0499352	0.272424	0.0272873	0.512485	0.8219	Undecided
Elderly 360° vs 180°	0	-0.01	0.01	0.954	0.00412729	-0.0385116	-0.230301	0.149572	1	Accepted
PD 180° vs 90°	0.02	0	0.04	0.044	0.11856	0.34344	0.0728812	0.613516	0.6128	Undecided
PD 360° vs 90°	0.02	0	0.03	0.055	0.0871238	0.307395	0.0620011	0.553647	0.7244	Undecided
PD 360° vs 180°	0	-0.01	0.01	0.92	0.00384442	-0.0356321	-0.221881	0.148408	1	Accepted
FOG 180° vs 90°	0.03	0.01	0.04	0.004	1.24065	0.431446	0.186791	0.681611	0.3271	Undecided
FOG 360° vs 90°	0.01	-0.01	0.02	0.737	0.00598333	0.0980598	-0.125196	0.322733	1	Accepted
FOG 360° vs 180°	-0.02	-0.03	-0.01	< .001	3.45064	-0.333474	-0.503977	-0.159379	0.7076	Undecided
Gait Cycle Duration External Leg
	Estimate	(-95% CI)	(+95% CI)	p-Value	Bayes Factor	Cohen's d	(-95% CI)	(+95% CI)	HDI ROPE 95%	H0 Hypothesis
Group
90° PD vs Elderly	0.02	-0.07	0.12	0.857	0.0345615	0.446541	-1.26652	2.20436	0.3257	Undecided
90° FOG vs Elderly	-0.02	-0.12	0.07	0.872	0.0335044	-0.439261	-2.13004	1.23344	0.3328	Undecided
90° FOG vs PD	-0.05	-0.14	0.04	0.573	0.0489606	-0.853382	-2.51176	0.790085	0.2334	Undecided
180° PD vs Elderly	0.01	-0.09	0.1	0.992	0.0292323	0.0900495	-1.5437	1.7788	0.3836	Undecided
180° FOG vs Elderly	-0.03	-0.12	0.06	0.735	0.0385114	-0.571253	-2.23478	1.10091	0.3009	Undecided
180° FOG vs PD	-0.04	-0.13	0.06	0.712	0.0410255	-0.634027	-2.2885	1.03355	0.2818	Undecided
360° PD vs Elderly	0.01	-0.09	0.1	0.998	0.0279201	0.121741	-1.5449	1.81208	0.3839	Undecided
360° FOG vs Elderly	-0.04	-0.14	0.05	0.597	0.0479744	-0.803555	-2.5069	0.891693	0.2396	Undecided
360° FOG vs PD	-0.05	-0.14	0.04	0.522	0.0530743	-0.895731	-2.57751	0.755163	0.216	Undecided
Turning Amplitude
Elderly 180° vs 90°	0.02	0	0.04	0.041	0.139796	0.386013	0.0857643	0.692402	0.5212	Undecided
Elderly 360° vs 90°	0.02	0	0.03	0.053	0.0966274	0.343333	0.0683208	0.620719	0.6441	Undecided
Elderly 360° vs 180°	0	-0.01	0.01	0.898	0.00400676	-0.0412642	-0.240385	0.162539	1	Accepted
PD 180° vs 90°	0	-0.01	0.02	0.91	0.00527628	0.0597878	-0.208842	0.328898	1	Accepted
PD 360° vs 90°	0	-0.01	0.02	0.986	0.00455584	0.0364948	-0.210082	0.27799	1	Accepted
PD 360° vs 180°	0	-0.01	0.01	0.992	0.00330983	-0.0243105	-0.205674	0.159094	1	Accepted
FOG 180° vs 90°	0.02	0	0.03	0.158	0.0306235	0.26935	-0.00597979	0.542618	0.8244	Undecided
FOG 360° vs 90°	0	-0.01	0.01	0.998	0.00446565	-0.0146531	-0.263009	0.231693	1	Accepted
FOG 360° vs 180°	-0.02	-0.03	-0.01	0.008	0.405649	-0.282507	-0.460012	-0.104969	0.907	Undecided
Stance Duration Internal Leg
	Estimate	(-95% CI)	(+95% CI)	p-Value	Bayes Factor	Cohen's d	(-95% CI)	(+95% CI)	HDI ROPE 95%	H0 Hypothesis
Group
90° PD vs Elderly	0.02	-0.05	0.08	0.894	0.0237618	0.343099	-1.0698	1.76309	0.3603	Undecided
90° FOG vs Elderly	0.01	-0.06	0.07	0.993	0.0213774	0.138024	-1.24435	1.56175	0.3996	Undecided
90° FOG vs PD	-0.01	-0.08	0.06	0.974	0.0209399	-0.17728	-1.58042	1.2168	0.3936	Undecided
180° PD vs Elderly	0	-0.07	0.06	> .999	0.021062	-0.0536568	-1.47412	1.35816	0.4001	Undecided
180° FOG vs Elderly	0	-0.07	0.06	0.992	0.0207794	-0.0964397	-1.49594	1.30518	0.4053	Undecided
180° FOG vs PD	0	-0.07	0.06	0.96	0.021218	-0.0737189	-1.4634	1.32725	0.3997	Undecided
360° PD vs Elderly	0	-0.07	0.07	0.968	0.0203506	-0.0161383	-1.41082	1.42111	0.414	Undecided
360° FOG vs Elderly	-0.01	-0.08	0.05	0.884	0.0226832	-0.251942	-1.66507	1.1533	0.3815	Undecided
360° FOG vs PD	-0.01	-0.08	0.05	0.903	0.022153	-0.261056	-1.64872	1.1429	0.3781	Undecided
Turning Amplitude
Elderly 180° vs 90°	0.03	0.02	0.04	< .001	34287860000000	0.658459	0.454667	0.860483	0	Rejected
Elderly 360° vs 90°	0.03	0.02	0.04	< .001	5886818000000000	0.629589	0.444558	0.814904	0	Rejected
Elderly 360° vs 180°	0	-0.01	0.01	0.923	0.00262275	-0.0280641	-0.185861	0.133519	1	Accepted
PD 180° vs 90°	0.01	0	0.02	0.021	0.143478	0.277082	0.0865771	0.474004	0.7575	Undecided
PD 360° vs 90°	0.01	0.01	0.02	0.006	0.421709	0.292284	0.114522	0.47064	0.7899	Undecided
PD 360° vs 180°	0	-0.01	0.01	0.972	0.00236936	0.0151003	-0.140187	0.171069	1	Accepted
FOG 180° vs 90°	0.02	0.01	0.03	< .001	488.017	0.418553	0.231879	0.607557	0.2256	Undecided
FOG 360° vs 90°	0.01	0	0.02	0.021	0.121071	0.239586	0.0720679	0.407541	0.9183	Undecided
FOG 360° vs 180°	-0.01	-0.02	0	0.057	0.0389721	-0.177973	-0.321123	-0.0340274	1	Accepted
Stance Duration External Leg
	Estimate	(-95% CI)	(+95% CI)	p-Value	Bayes Factor	Cohen's d	(-95% CI)	(+95% CI)	HDI ROPE 95%	H0 Hypothesis
Group
90° PD vs Elderly	0.04	-0.04	0.11	0.633	0.0365644	0.851395	-0.869954	2.65956	0.2511	Undecided
90° FOG vs Elderly	0.02	-0.06	0.09	0.887	0.0265521	0.454706	-1.29984	2.2018	0.3346	Undecided
90° FOG vs PD	-0.02	-0.09	0.06	0.92	0.0259743	-0.398904	-2.15327	1.33153	0.3528	Undecided
180° PD vs Elderly	0.02	-0.05	0.1	0.863	0.0279175	0.521887	-1.19958	2.29965	0.3271	Undecided
180° FOG vs Elderly	0	-0.07	0.08	0.997	0.0243941	0.0907274	-1.66369	1.85666	0.3743	Undecided
180° FOG vs PD	-0.02	-0.1	0.06	0.868	0.0261348	-0.432782	-2.23991	1.29627	0.3525	Undecided
360° PD vs Elderly	0.03	-0.04	0.1	0.68	0.0331092	0.69899	-1.0467	2.4307	0.2796	Undecided
360° FOG vs Elderly	0	-0.08	0.07	0.995	0.0223904	-0.0791366	-1.81427	1.64405	0.389	Undecided
360° FOG vs PD	-0.03	-0.11	0.04	0.596	0.0376426	-0.782567	-2.5401	0.914056	0.254	Undecided
Turning Amplitude
Elderly 180° vs 90°	0.02	0.01	0.03	< .001	6.99416	0.45434	0.24732	0.661586	0.3354	Undecided
Elderly 360° vs 90°	0.01	0	0.02	0.015	0.184992	0.280867	0.0907338	0.470563	0.9345	Undecided
Elderly 360° vs 180°	-0.01	-0.01	0	0.135	0.0170293	-0.172335	-0.337935	-0.00476866	1	Accepted
PD 180° vs 90°	0.01	0	0.01	0.421	0.00674429	0.138642	-0.0539423	0.335656	1	Accepted
PD 360° vs 90°	0.01	0	0.01	0.325	0.00771069	0.135615	-0.0442821	0.310436	1	Accepted
PD 360° vs 180°	0	-0.01	0.01	0.997	0.00218341	-0.00181631	-0.154558	0.151585	1	Accepted
FOG 180° vs 90°	0	0	0.01	0.617	0.00447346	0.102596	-0.0926301	0.29894	1	Accepted
FOG 360° vs 90°	-0.01	-0.02	0	0.028	0.0880787	-0.24604	-0.42779	-0.0673992	0.9895	Undecided
FOG 360° vs 180°	-0.01	-0.02	-0.01	< .001	118839	-0.347759	-0.495828	-0.19661	0.8103	Undecided
Initial Double Support Duration Internal Leg
	Estimate	(-95% CI)	(+95% CI)	p-Value	Bayes Factor	Cohen's d	(-95% CI)	(+95% CI)	HDI ROPE 95%	H0 Hypothesis
Group
90° PD vs Elderly	0.02	-0.01	0.05	0.464	0.0176918	0.631175	-0.425164	1.72072	0.2383	Undecided
90° FOG vs Elderly	0.02	0	0.05	0.242	0.035738	0.879274	-0.165471	1.93413	0.1143	Undecided
90° FOG vs PD	0.01	-0.02	0.04	0.925	0.00996365	0.26248	-0.770345	1.3412	0.4121	Undecided
180° PD vs Elderly	0.01	-0.02	0.03	0.937	0.00936258	0.197443	-0.854705	1.27472	0.4301	Undecided
180° FOG vs Elderly	0.01	-0.02	0.04	0.686	0.0124972	0.436985	-0.649979	1.51223	0.3256	Undecided
180° FOG vs PD	0.01	-0.02	0.03	0.926	0.00926364	0.234924	-0.827603	1.30522	0.4339	Undecided
360° PD vs Elderly	0.01	-0.02	0.04	0.767	0.0117911	0.375908	-0.68847	1.43409	0.3589	Undecided
360° FOG vs Elderly	0.01	-0.01	0.04	0.616	0.0139695	0.489597	-0.546364	1.5332	0.3087	Undecided
360° FOG vs PD	0	-0.03	0.03	0.981	0.00939602	0.101634	-0.991513	1.17705	0.4321	Undecided
Turning Amplitude
Elderly 180° vs 90°	0.02	0.01	0.02	< .001	712947100000000	0.675355	0.440469	0.912036	0	Rejected
Elderly 360° vs 90°	0.02	0.01	0.02	< .001	2.38784e+16	0.608232	0.3936	0.823175	0	Rejected
Elderly 360° vs 180°	0	-0.01	0	0.783	0.00195794	-0.0675553	-0.246186	0.109964	1	Accepted
PD 180° vs 90°	0.01	0	0.01	0.096	0.0202132	0.250474	0.0240515	0.474792	0.6835	Undecided
PD 360° vs 90°	0.01	0	0.01	0.004	0.478189	0.360153	0.156498	0.564284	0.2827	Undecided
PD 360° vs 180°	0	0	0.01	0.436	0.00331621	0.109517	-0.059674	0.27599	1	Accepted
FOG 180° vs 90°	0.01	0	0.01	0.087	0.0202985	0.246059	0.0322013	0.458461	0.7106	Undecided
FOG 360° vs 90°	0.01	0	0.01	0.089	0.0177346	0.221901	0.0254571	0.414766	0.8094	Undecided
FOG 360° vs 180°	0	0	0	0.947	0.00139541	-0.0226999	-0.179209	0.131435	1	Accepted
Initial Double Support Duration External Leg
	Estimate	(-95% CI)	(+95% CI)	p-Value	Bayes Factor	Cohen's d	(-95% CI)	(+95% CI)	HDI ROPE 95%	H0 Hypothesis
Group
90° PD vs Elderly	0.01	-0.02	0.04	0.78	0.0120096	0.506791	-0.85487	1.886	0.325	Undecided
90° FOG vs Elderly	0.02	-0.01	0.05	0.454	0.0202243	0.874763	-0.529002	2.26249	0.1977	Undecided
90° FOG vs PD	0.01	-0.02	0.04	0.909	0.00999483	0.352867	-0.986722	1.77244	0.3821	Undecided
180° PD vs Elderly	0.01	-0.02	0.04	0.801	0.0112379	0.431415	-0.96977	1.81134	0.3499	Undecided
180° FOG vs Elderly	0.02	-0.01	0.04	0.545	0.0164108	0.720376	-0.666436	2.06195	0.2413	Undecided
180° FOG vs PD	0.01	-0.03	0.04	0.922	0.0103284	0.253494	-1.16642	1.67857	0.3865	Undecided
360° PD vs Elderly	0.01	-0.02	0.04	0.766	0.0117513	0.503926	-0.849549	1.86871	0.3296	Undecided
360° FOG vs Elderly	0.01	-0.02	0.04	0.65	0.0135876	0.557541	-0.804284	1.91317	0.3001	Undecided
360° FOG vs PD	0	-0.03	0.03	0.982	0.00859116	0.0655241	-1.27857	1.42023	0.4382	Undecided
Turning Amplitude
Elderly 180° vs 90°	0.02	0.01	0.02	< .001	101451700000000	0.708364	0.470719	0.945013	0	Rejected
Elderly 360° vs 90°	0.01	0.01	0.02	< .001	31546310000000	0.566187	0.350079	0.778364	0.0037	Undecided
Elderly 360° vs 180°	0	-0.01	0	0.317	0.00390267	-0.140096	-0.317708	0.0364006	1	Accepted
PD 180° vs 90°	0.01	0.01	0.02	< .001	49021020000000	0.623548	0.399669	0.846505	0	Rejected
PD 360° vs 90°	0.01	0.01	0.02	< .001	35533600000000	0.545807	0.343093	0.748172	0.0084	Undecided
PD 360° vs 180°	0	-0.01	0	0.644	0.00177792	-0.0774685	-0.243653	0.0903043	1	Accepted
FOG 180° vs 90°	0.01	0.01	0.02	< .001	72288.8	0.532452	0.312651	0.752239	0.0346	Undecided
FOG 360° vs 90°	0	0	0.01	0.108	0.0130443	0.217466	0.0205694	0.412372	0.941	Undecided
FOG 360° vs 180°	-0.01	-0.01	0	< .001	1.11149	-0.314039	-0.474032	-0.155142	0.7171	Undecided
Stance/Cycle Ratio: Internal Leg
	Estimate	(-95% CI)	(+95% CI)	p-Value	Bayes Factor	Cohen's d	(-95% CI)	(+95% CI)	HDI ROPE 95%	H0 Hypothesis
Group
90° PD vs Elderly	0.44	-2.78	3.59	0.964	1.05843	0.196483	-1.23311	1.5934	0.3125	Undecided
90° FOG vs Elderly	0.46	-2.61	3.62	0.965	1.025	0.2038	-1.16998	1.61898	0.3221	Undecided
90° FOG vs PD	0.46	-2.68	3.63	0.944	1.02798	0.203875	-1.18692	1.61598	0.3172	Undecided
180° PD vs Elderly	0.43	-2.59	3.51	0.979	1.01565	0.191081	-1.15097	1.56614	0.3202	Undecided
180° FOG vs Elderly	0.47	-2.63	3.58	0.976	1.02899	0.20847	-1.17416	1.59449	0.3181	Undecided
180° FOG vs PD	0.45	-2.65	3.54	0.951	1.04741	0.202517	-1.1761	1.57991	0.3134	Undecided
360° PD vs Elderly	0.44	-2.61	3.58	0.983	1.01609	0.197819	-1.16418	1.59767	0.3189	Undecided
360° FOG vs Elderly	0.43	-2.7	3.51	0.955	1.04067	0.192049	-1.20401	1.56246	0.3199	Undecided
360° FOG vs PD	0.43	-2.79	3.58	0.971	1.01114	0.193089	-1.23624	1.58918	0.3139	Undecided
Turning Amplitude
Elderly 180° vs 90°	2.26	1.71	2.83	< .001	2513377000000000	1.00775	0.759999	1.26372	0	Rejected
Elderly 360° vs 90°	2.89	2.38	3.41	< .001	4.46712e+19	1.28668	1.0564	1.52164	0	Rejected
Elderly 360° vs 180°	0.64	0.22	1.06	0.013	10.9032	0.286734	0.0987806	0.471902	0.484	Undecided
PD 180° vs 90°	1.76	1.17	2.34	< .001	8241053000000000	0.783526	0.520893	1.04196	0	Rejected
PD 360° vs 90°	2.44	1.91	2.97	< .001	1.02113e+16	1.08678	0.84834	1.32417	0	Rejected
PD 360° vs 180°	0.68	0.28	1.07	0.004	32.489	0.302083	0.125849	0.478983	0.4142	Undecided
FOG 180° vs 90°	1.99	1.47	2.52	< .001	8517991000000000	0.886034	0.653328	1.12096	0	Rejected
FOG 360° vs 90°	2.46	1.99	2.94	< .001	2.79372e+17	1.0958	0.883521	1.31194	0	Rejected
FOG 360° vs 180°	0.49	0.12	0.86	0.037	3.18215	0.216425	0.0523813	0.38229	0.8044	Undecided
Stance/Cycle Ratio: External Leg
	Estimate	(-95% CI)	(+95% CI)	p-Value	Bayes Factor	Cohen's d	(-95% CI)	(+95% CI)	HDI ROPE 95%	H0 Hypothesis
Group
90° PD vs Elderly	0.45	-2.67	3.55	0.931	1.01768	0.240534	-1.42868	1.89626	0.3319	Undecided
90° FOG vs Elderly	0.48	-2.72	3.61	0.974	1.00098	0.256283	-1.45082	1.91695	0.3274	Undecided
90° FOG vs PD	0.45	-2.68	3.62	0.968	1.07241	0.238487	-1.42178	1.92617	0.3224	Undecided
180° PD vs Elderly	0.46	-2.72	3.6	0.947	1.04194	0.244275	-1.44575	1.91578	0.3282	Undecided
180° FOG vs Elderly	0.49	-2.66	3.54	0.959	1.05153	0.259093	-1.41816	1.89375	0.3244	Undecided
180° FOG vs PD	0.48	-2.67	3.62	0.954	1.02865	0.253902	-1.42277	1.92479	0.3286	Undecided
360° PD vs Elderly	0.47	-2.71	3.59	0.952	1.03693	0.249775	-1.44538	1.91049	0.317	Undecided
360° FOG vs Elderly	0.45	-2.65	3.58	0.967	1.00204	0.241133	-1.41242	1.9006	0.33	Undecided
360° FOG vs PD	0.46	-2.61	3.5	0.987	1.00825	0.244877	-1.38856	1.86235	0.3236	Undecided
Turning Amplitude
Elderly 180° vs 90°	0.62	0.11	1.16	0.067	2.44338	0.332247	0.0560199	0.61936	0.5605	Undecided
Elderly 360° vs 90°	0.5	0.03	0.98	0.124	1.22787	0.266445	0.0148312	0.524433	0.7572	Undecided
Elderly 360° vs 180°	-0.11	-0.49	0.25	0.856	0.138864	-0.0580861	-0.260346	0.135233	1	Accepted
PD 180° vs 90°	1.22	0.74	1.7	< .001	2.57341e+17	0.649154	0.393585	0.909419	0	Rejected
PD 360° vs 90°	1.62	1.18	2.06	< .001	2.15913e+24	0.861429	0.627002	1.09786	0	Rejected
PD 360° vs 180°	0.41	0.07	0.75	0.06	1.75143	0.216154	0.0372316	0.397265	0.9484	Undecided
FOG 180° vs 90°	0.05	-0.44	0.54	0.962	0.170514	0.02736	-0.233131	0.285983	1	Accepted
FOG 360° vs 90°	-0.1	-0.54	0.36	0.886	0.161078	-0.0513472	-0.287529	0.190417	1	Accepted
FOG 360° vs 180°	-0.14	-0.47	0.19	0.705	0.149924	-0.0755864	-0.249382	0.102333	1	Accepted
